# Supplementary material for: Is increasing urbanicity associated with changes in breastfeeding duration in rural India? An analysis of cross-sectional household data from the Andhra Pradesh children and parents study
Source: PubMed Central journal article supplement (PMC5623574; doi:10.1136/bmjopen-2017-016331), 2017-09-21
Supplement: bmjopen-2017-016331.draft_revisions.pdf [file bmjopen-2017-016331.draft_revisions.pdf]

# BMJ Open

## Is increasing urbanicity associated with changes in breastfeeding duration in rural India? An analysis from the Andhra Pradesh Children and Parents Study

|                                 |                                                                                                                                                                                                                                                                                                                                                                                                                                                                                                                                                                                                                                                                                                                                                                                                                                                                                                                                                                                                                                                                                                                                                                        |
|---------------------------------|------------------------------------------------------------------------------------------------------------------------------------------------------------------------------------------------------------------------------------------------------------------------------------------------------------------------------------------------------------------------------------------------------------------------------------------------------------------------------------------------------------------------------------------------------------------------------------------------------------------------------------------------------------------------------------------------------------------------------------------------------------------------------------------------------------------------------------------------------------------------------------------------------------------------------------------------------------------------------------------------------------------------------------------------------------------------------------------------------------------------------------------------------------------------|
| Journal:                        | <i>BMJ Open</i>                                                                                                                                                                                                                                                                                                                                                                                                                                                                                                                                                                                                                                                                                                                                                                                                                                                                                                                                                                                                                                                                                                                                                        |
| Manuscript ID                   | bmjopen-2017-016331                                                                                                                                                                                                                                                                                                                                                                                                                                                                                                                                                                                                                                                                                                                                                                                                                                                                                                                                                                                                                                                                                                                                                    |
| Article Type:                   | Research                                                                                                                                                                                                                                                                                                                                                                                                                                                                                                                                                                                                                                                                                                                                                                                                                                                                                                                                                                                                                                                                                                                                                               |
| Date Submitted by the Author:   | 08-Feb-2017                                                                                                                                                                                                                                                                                                                                                                                                                                                                                                                                                                                                                                                                                                                                                                                                                                                                                                                                                                                                                                                                                                                                                            |
| Complete List of Authors:       | Oakley, Laura; London School of Hygiene and Tropical Medicine, Non-communicable Disease Epidemiology<br>Baker, Chris; London School of Hygiene and Tropical Medicine, Non-communicable Disease Epidemiology<br>Addanki, Srivalli; Indian Institute of Public Health<br>Gupta, Vipin; University of Delhi, Department of Anthropology<br>Walia, Gagandeep; Public Health Foundation of India, Centre for Control of Chronic Conditions<br>Aggarwal, Aastha; Public Health Foundation of India, Centre for Control of Chronic Conditions<br>Bhogadi, Santhi; Indian Institute of Public Health<br>Kulkarni, Bharati; National Institute of Nutrition<br>Wilson, Robin; University of Southampton, Geography & Environment<br>Prabhakaran, Dorairaj; Public Health Foundation of India, Centre for Control of Chronic Conditions<br>Ben-Shlomo, Yoav; University of Bristol, School of Social and Community Medicine<br>Davey Smith, George; University of Bristol, School of Social and Community Medicine<br>Radha Krishna, KV; National Institute of Nutrition<br>Kinra, Sanjay; London School of Hygiene and Tropical Medicine, Non-communicable Disease Epidemiology |
| <b>Primary Subject Heading</b>: | Epidemiology                                                                                                                                                                                                                                                                                                                                                                                                                                                                                                                                                                                                                                                                                                                                                                                                                                                                                                                                                                                                                                                                                                                                                           |
| Secondary Subject Heading:      | Global health                                                                                                                                                                                                                                                                                                                                                                                                                                                                                                                                                                                                                                                                                                                                                                                                                                                                                                                                                                                                                                                                                                                                                          |
| Keywords:                       | SOCIAL MEDICINE, NUTRITION & DIETETICS, PUBLIC HEALTH                                                                                                                                                                                                                                                                                                                                                                                                                                                                                                                                                                                                                                                                                                                                                                                                                                                                                                                                                                                                                                                                                                                  |
|                                 |                                                                                                                                                                                                                                                                                                                                                                                                                                                                                                                                                                                                                                                                                                                                                                                                                                                                                                                                                                                                                                                                                                                                                                        |

SCHOLARONE™  
Manuscripts

1  
2  
3 **Is increasing urbanicity associated with changes in breastfeeding duration in rural India? An**  
4 **analysis from the Andhra Pradesh Children and Parents Study**  
5  
6

7 Running title: Urbanicity and breastfeeding in rural India  
8  
9

10  
11  
12  
13 Oakley L<sup>1\*</sup>, Baker C<sup>1</sup>, Addanki S<sup>2</sup>, Gupta V<sup>3</sup>, Walia GK<sup>4</sup>, Aggarwal A<sup>4</sup>, Bhogadi S<sup>2</sup>, Kulkarni B<sup>5</sup>,  
14 Wilson RT<sup>6</sup>, Prabhakaran D<sup>4</sup>, Ben-Shlomo Y<sup>7</sup>, Smith GD<sup>7</sup>, Radha Krishna KV<sup>5</sup>, Kinra S<sup>1</sup>  
15  
16

17  
18  
19  
20  
21  
22  
23  
24  
25  
26  
27 <sup>1</sup>Department of Non-communicable Disease Epidemiology, London School of Hygiene, London,  
28 UK.  
29

30 <sup>2</sup>Indian Institute of Public Health, Hyderabad, India.  
31

32 <sup>3</sup>Department of Anthropology, University of Delhi, India.  
33

34 <sup>4</sup>Centre for Control of Chronic Conditions, Public Health Foundation of India, New Delhi, India  
35

36 <sup>5</sup>National Institute of Nutrition, Hyderabad, India.  
37

38 <sup>6</sup>Geography & Environment, University of Southampton, Southampton, UK.  
39

40 <sup>7</sup>School of Social and Community Medicine, University of Bristol, Bristol, UK.  
41  
42

43  
44 \*Corresponding author

45 Dr Laura Oakley, Assistant Professor, Department of Non-communicable Disease Epidemiology,  
46 London School of Hygiene and Tropical Medicine, Keppel St, London WC1E 7HT  
47 ([laura.oakley@lshtm.ac.uk](mailto:laura.oakley@lshtm.ac.uk))  
48  
49

50  
51  
52 *Main text word count: 3729 words*  
53  
54  
55  
56  
57  
58  
59  
60

## ABSTRACT

**Objective:** To investigate whether village-level urbanicity and lower-level socio-economic factors are associated with breastfeeding practices in transitioning rural communities in India.

**Setting:** 29 villages in Rangareddy district, southern India between 2011-2014.

**Participants:** 7,848 children under 6 years identified via a cross-sectional household survey conducted as part of the Andhra Pradesh Children and Parents Study.

**Outcome measures:** Two key indicators of optimal breastfeeding: termination of exclusive breastfeeding before six months and discontinuation of breastfeeding by 24 months. Village urbanicity was classified as low, medium or high according to satellite assessed night-light intensity.

**Results:** Breastfeeding initiation was almost universal, and approximately two in three children were exclusively breastfed to six months and a similar proportion breastfed to 24 months. Using multilevel logistic regression, increasing urbanicity was associated with breastfeeding discontinuation before 24 months (medium urbanicity OR 1.45, 95% CI 0.71-2.96; high urbanicity OR 2.96, 95% CI 1.45-6.05) but not with early (<6 months) termination of exclusive breastfeeding. Increased maternal education was independently associated with both measures of suboptimal breastfeeding, and higher household socio-economic position was associated with early termination of exclusive breastfeeding.

**Conclusion:** In this transitional Indian rural community, early stage urbanicity was associated with a shorter duration of breastfeeding. Closer surveillance of changes in breastfeeding practices alongside appropriate intervention strategies are recommended for emerging economies.

**ARTICLE SUMMARY**

- Previous studies have investigated the association between urbanisation and breastfeeding using the urban-rural dichotomy.
- We used data from a large rural cohort in southern India that is currently undergoing rapid and uneven urbanisation due to its proximity to a major urban centre.
- The use of night-time light intensity data as an indicator of urbanicity allowed us to examine subtler changes in breastfeeding practices along the urban-rural continuum.
- Sixteen percent of children were excluded from the analysis due to missing information on breastfeeding practices.
- We relied on maternal retrospective recall of breastfeeding events for our outcome measurement.

## INTRODUCTION

The promotion of breastfeeding is one of the three interventions identified as having the largest potential impact on global child death[1]. Optimal breastfeeding is defined by the World Health Organisation (WHO) as early breastfeeding initiation, exclusive breastfeeding to six months, and continued breastfeeding to two years or beyond alongside appropriate complementary feeding. Many low and middle income countries (LMICs) have a strong tradition of near universal and prolonged breastfeeding[2, 3], though exclusive breastfeeding to six months (hereafter referred to simply as ‘exclusive breastfeeding’) is less common. A small increase in the global proportion of children exclusively breastfed between 1995 and 2010 has been reported, but the overall proportion (40%) still falls strikingly short of universal coverage and obscures differences in country-specific trends[4].

Many LMICs are currently experiencing a rapid increase in the proportion of people living in built-up areas, and the social, cultural and economic changes associated with this process of urbanisation have the potential to impact on traditional breastfeeding practices. Direct threats to optimal breastfeeding include early introduction of other liquids, and inappropriate supplementation with solid or semi-solid foods. These behaviours may be influenced by changing social norms, for example increasing numbers of mothers working outside the home. Of all positive health behaviours, breastfeeding is one of the few more prevalent in LMICs compared to HICs[3]. Within LMICs this trend is mirrored by a higher prevalence of suboptimal breastfeeding in urban areas compared to rural areas[5]: a trend also observed in India[6-8] alongside variation by various socio-economic indicators [6-10]. Although the high level urban-rural comparison is of interest, there may also be subtler changes in breastfeeding practices along the urban-rural continuum given the peri-urban effects on villages close to urban centres. These changes can potentially be investigated by using a measure of ‘urbanicity’ which aims to assess the extent of urbanisation in a given area. A number of different indicators of urbanicity have evolved, including the use of remote light sensing[11, 12], and

1  
2  
3 multi-component scales[13, 14]. The early identification of changes in breastfeeding practices  
4  
5 accompanying the urbanicity transition - and an understanding of the underlying mechanisms - are  
6  
7 necessary for informing appropriate interventions to protect traditionally positive breastfeeding  
8  
9 practices in transitioning communities.  
10

11  
12 The Andhra Pradesh Children and Parents Study (APCAPS) is a rural socio-demographic cohort in  
13  
14 southern India that is currently undergoing rapid and uneven urbanisation due to its proximity to a  
15  
16 major urban centre (Hyderabad), providing a unique opportunity to examine the association between  
17  
18 early stage urbanicity and breastfeeding practices.  
19  
20

## 21 22 23 24 **METHODS**

### 25 26 27 **Study design**

28  
29 APCAPS is an intergenerational cohort originally established to study the long-term effects of early-  
30  
31 life undernutrition on risk of cardiovascular disease and subsequently expanded to include trans-  
32  
33 generational influences of other environmental and genetic factors on chronic diseases in  
34  
35 transitioning rural India.  
36  
37

38  
39 The original cohort is based on the participants in the Hyderabad Nutrition Trial (HNT) conducted in  
40  
41 1987–90 in 29 villages approximately 50-100km from Hyderabad in Telangana state (formally  
42  
43 Andhra Pradesh), southern India[15]. The dataset used in this analysis is based on a cross-sectional  
44  
45 household survey conducted between 2011 and 2014 in the study villages. All households  
46  
47 (household defined as a group of people living in the same residence and sharing a common kitchen)  
48  
49 in the study villages were visited by fieldworkers and socio-demographic information was collected  
50  
51 on each household. In addition, a basic health profile was collected for each child under 6 years of  
52  
53 age, comprising information on infant feeding (colostrum intake, total duration of breastfeeding, age  
54  
55 of onset of weaning), immunization and anthropometric measurements. Fieldworkers made repeated  
56  
57  
58  
59  
60

1  
2  
3 visits to households to maximise response and to clarify inconsistencies in collected data. Data were  
4  
5 collected from 23,314 households in total, of which 5,968 (25.6%) included at least one child under 6  
6  
7 years.  
8

9  
10 The study received approval from the ethics committees of the National Institute of Nutrition (NIN)  
11  
12 (Hyderabad, India) and London School of Hygiene and Tropical Medicine (London, UK). Approval  
13  
14 was also sought from the Indian Council for Medical Research and the village heads and their  
15  
16 committees in each of the study villages. Written informed consent (or witnessed thumbprint if  
17  
18 illiterate) was obtained from the participants prior to their inclusion in the study.  
19  
20

### 21 22 23 **Breastfeeding outcomes and explanatory variables**

24  
25  
26 Two breastfeeding outcomes were used in this analysis: termination of exclusive breastfeeding  
27  
28 (EBF) before six months, and discontinuation of breastfeeding before 24 months. These outcomes  
29  
30 reflect failure to achieve two of the specific WHO recommendations for optimum feeding practices  
31  
32 (exclusive breastfeeding to six months and continued breastfeeding to two years)[16]. The age of the  
33  
34 child at termination of EBF was derived from information provided by mothers on the child's age at  
35  
36 'weaning' (defined by fieldworkers as the age at which the child was given anything other than  
37  
38 mother's milk, i.e. age at initiation of complementary feeding).  
39  
40

41  
42 Our primary explanatory factor was urbanicity, measured using remotely-sensed village-level night-  
43  
44 time light intensity (NTLI) scores, as these are objective, unbiased and easily available over wide  
45  
46 areas. Although this analysis represents the first application of NTLI data to the APCAPS  
47  
48 population, NTLI data is increasingly being used as an area-based indicator of socio-economic  
49  
50 development[11, 12]. The light which is included in the NTLI score include any outside lights,  
51  
52 ranging from fires and gas flares to lights related to human settlements. Low level lights such as from  
53  
54 streets and car headlights can be observed if there is a sufficient number of sources, but indoor lights  
55  
56  
57  
58  
59  
60

1  
2  
3 cannot be observed. NTLI scores were calculated for 2012 using the National Oceanic and  
4 Atmospheric Administration (NOAA) Stable Lights product which provides yearly average night-  
5 time light intensity measures processed and filtered to remove events such as fires and lightning  
6 contamination by cloud or moon reflections and background noise, at a 1km resolution. Scores for  
7 each village were calculated by summing the raw NTLI values over each village polygon (digitised  
8 using Bing Maps combined with GPS-based surveying by the field teams). The 1km-resolution NTLI  
9 data was upscaled to 100m resolution to allow more accurate estimation of the NTLI values covered  
10 by each polygon, as many villages are small and partially cover multiple 1km grid cells.  
11  
12  
13  
14  
15  
16  
17  
18  
19

20  
21 NTLI scores for each village were validated against alternative urbanicity measurements (field  
22 worker ranking and a multi-component urbanicity score based on household-level material assets and  
23 village-level availability of infrastructure and services) showing positive correlations (0.65 and 0.53  
24 respectively) . Study villages were ranked by their NTLI score and divided into tertiles to represent  
25 'low' (10 villages), 'medium' (10 villages) and 'high' (9 villages) levels of urbanicity. The NTLI tertile  
26 scores matched the field worker ranking in 50% of the villages, and cases of disagreement between  
27 NTLI and field worker ranking, the latter was more conservative and ranked villages as medium  
28 urbanicity rather than high urbanicity. Only one village had a significant divergence between NTLI  
29 and fieldworker ranking.  
30  
31  
32  
33  
34  
35  
36  
37  
38  
39  
40

41 In addition, we investigated mother-level socio-economic factors which may be correlated with  
42 urbanicity: maternal education (no formal education, primary education, or secondary education and  
43 higher), maternal employment (paid work vs. no paid work), and a household level standard of living  
44 index (SLI). Asset-based SLIs have been established as a valid proxy measure of household  
45 wealth[17]. We generated a SLI score for each household, calculated by using information on  
46 household assets including house and land ownership, characteristics of the home (electricity, water  
47 pump, separate kitchen, separate toilet) and ownership of various assets (tractor, radio, AC, washing  
48 machine, bore hole, telephone, TV, fridge, bicycle, two wheeler, four wheeler, bank account, animal  
49  
50  
51  
52  
53  
54  
55  
56  
57  
58  
59  
60



1  
2  
3 cart, sofa, cot/bed, mattress, table). Principal component analysis (PCA) was used to determine the  
4  
5 weights for each component in the index[18], and households were divided into quintiles according  
6  
7 to their weighted score. We also report data on a number of other factors likely to be associated with  
8  
9 breastfeeding practices: sex of child, birth order, maternal age (grouped), and household composition  
10  
11 (joint/extended or nuclear).  
12

### 13 14 15 16 17 **Statistical analysis** 18

19  
20 We included in the analysis all children under 6 years who were breastfed at least once and for whom  
21  
22 information was available on feeding history. The analysis investigating termination of EBF before  
23  
24 six months was restricted to children six months or older at the time of survey, and correspondingly  
25  
26 only those children aged 24 months or older were included in the analysis of discontinuation of  
27  
28 breastfeeding before 24 months. A small proportion of children (3%) had missing information on one  
29  
30 or more variables of interest and were excluded.  
31  
32

33  
34 We hypothesised that urbanicity would be associated with less favourable breastfeeding practices.  
35  
36 This could operate through at least two different indirect pathways (see figure 1): through increasing  
37  
38 individual-level employment, education or assets so that households are less likely to maintain  
39  
40 breastfeeding, or due to more urbanised villages have a different ‘collective’ attitude to  
41  
42 breastfeeding. We investigated these hypotheses by using multilevel logistic regression modelling  
43  
44 with children (level 1) nested within mothers (level 2, max n=5,477) nested within villages (level 3,  
45  
46 n=29). This approach allowed us to model the variation in breastfeeding outcomes at each level  
47  
48 (random effects), and to estimate the effect of specific mother and village-level factors on  
49  
50 breastfeeding practices (fixed effects). We initially fitted a null model (model 1) for each of the two  
51  
52 outcomes with random intercepts only in order to estimate the baseline between-mother and  
53  
54 between-village variance. We then fitted a series of models for each breastfeeding outcome, adding  
55  
56  
57  
58  
59  
60

1  
2  
3 covariates as fixed effects to the included random effects, where fixed effects were interpreted as the  
4  
5 average effect on the specified breastfeeding outcome across all mothers and villages. These models  
6  
7 included individual demographic factors and mother-level socioeconomic indicators (model 2),  
8  
9 individual demographic factors and village-level urbanicity (model 3), and all variables (model 4).  
10  
11 Due to the correlation between socio-economic indicators and urbanicity, we considered estimates  
12  
13 from model 3 our main results. Proportional change in variance (PCV) was calculated as a measure  
14  
15 of change in mother-level (level 2) and village-level (level 3) variance between the null model and  
16  
17 subsequent models, and (for village-level variance only) the measure of change between a model  
18  
19 with (model 4) and without (model 2) the village-level urbanicity variable included.  
20  
21

22  
23 Estimates of the association between mother-level socio-economic variables and breastfeeding  
24  
25 outcomes were derived from model 2 (adjusted for individual-level demographic variables, but not  
26  
27 urbanicity).  
28  
29

30  
31 We hypothesised *a priori* that the association between village-level urbanicity and breastfeeding may  
32  
33 vary by household SLI and maternal education. We investigated these cross-level interactions in  
34  
35 further models (for SLI, comparing the richest two quintiles to the three poorest quintiles; for  
36  
37 education, comparing secondary education versus no or primary education).  
38  
39

40 All statistical analyses were conducted using Stata 14 (StataCorp, College Station, Texas, USA).  
41  
42  
43  
44

## 45 RESULTS

### 46 Characteristics of the sample

47  
48 Information on breastfeeding was available on a total of 7,848 children (5,390 households), 99%  
49  
50 (n=7,839) of whom were breastfed at least once (figure 2).  
51  
52  
53

54  
55 The characteristics of ever breastfed children by urbanicity of village are presented in table 1. There  
56  
57 was little variation in infant sex, birth order or maternal age by urbanicity of village. Children  
58  
59  
60

1  
2  
3 residing in villages classified as more urbanised had mothers that were more likely to have been  
4  
5 educated to secondary level, less likely to have mothers in paid employment, and a higher standard  
6  
7 of living according. Joint/extended families were slightly less prevalent in high urbanicity villages.  
8  
9

### 10 11 12 **Termination of EBF by six months**

13  
14  
15 One third of children (33.5%, n=2,420) were EBF for a period of less than six months (table 1).  
16

#### 17 18 *Fixed effects*

19  
20  
21 There was no statistically significant trend regarding early termination of EBF and village level  
22  
23 urbanicity. The prevalence of early termination of EBF was lowest in medium urbanicity villages  
24  
25 (27.2%), higher in lower urbanicity villages (33.6%), and highest in high urbanicity villages (36.5%).  
26

27  
28 In multivariable analysis there was no evidence that urbanicity was associated with termination of  
29  
30 EBF by six months (model 3, table 2), with little change in estimates after the addition of  
31  
32 demographic and socio-economic covariates to the model.  
33

34  
35 After adjustment for other individual- and mother-level covariates, both children of mothers with  
36  
37 primary education and children of mothers with secondary education were more likely to be EBF for  
38  
39 less than six months when compared to children of mothers with no formal education (primary  
40  
41 education OR 3.37, 95% CI 2.13-5.31; secondary education OR 1.69, 95% CI 1.12-2.54; model 2,  
42  
43 table 2). Increasing SLI quintile was associated with up to twice the odds of early termination of EBF  
44  
45 compared to children from the poorest households (richest quintile OR 2.11, 95% CI 1.22-3.63; p  
46  
47 value for trend = 0.003). There was some evidence that maternal employment was also associated  
48  
49 with early termination of EBF (OR 1.43, 95% CI 1.00-2.03). The estimates for socio-economic  
50  
51 variables did not change with the addition of urbanicity to the model.  
52  
53

#### 54 55 *Interaction effects*

1  
2  
3 There was no evidence of interaction between urbanicity and either household SLI or maternal  
4 education.  
5

6  
7  
8 *Random effects*  
9

10 There was statistically significant unexplained variance estimates at both the mother and village level  
11 (model 1, table 1). Unexplained variability was consistently higher at the mother level compared to  
12 the village level. The addition of individual level parameters resulted in a slight decline in  
13 community-level variation (variance 1.50 and 1.44 in models 1 and 2 respectively). There was a  
14 further decline in village-level variance when the urbanicity variable was added to the model  
15 (variance 1.32 in model 4). Comparing the village-level variance between model 2 and model 4  
16 suggests that 8.5% of the observed village-level variation can be explained by urbanicity.  
17  
18  
19  
20  
21  
22  
23  
24  
25  
26  
27  
28

29 **Discontinuation of breastfeeding by 24 months**  
30

31  
32 Nearly four in ten children (37.8%, n=2037) were breastfed for less than 24 months in total.  
33

34  
35 *Fixed effects*  
36

37 Discontinuation of breastfeeding by 24 months was more common in high urbanicity villages  
38 (42.1%) and least common in low urbanicity villages (29.6%). After adjustment for individual-level  
39 demographic factors, high urbanicity was associated with increased odds of breastfeeding  
40 discontinuation before 24 months (OR 2.64, 95% CI 1.29, 5.42; model 3, table 3). The OR for  
41 medium urbanicity was slightly increased, though not statistically significant at  $p < 0.05$  (OR 1.45,  
42 95% CI 0.71, 2.96; model 4) and there was evidence of a linear trend ( $p$  value 0.008). Additional  
43 adjustment for socio-economic variables resulted in a slight reduction in the odds ratios (high  
44 urbanicity OR 2.64, 95% CI 1.29, 5.42; medium urbanicity OR 1.35, 95% CI 0.66, 2.79; model 4).  
45  
46  
47  
48  
49  
50  
51  
52  
53  
54

55 When compared to children of mothers with no formal schooling, children of mothers with  
56 secondary education were at significantly higher odds of breastfeeding discontinuation after  
57  
58  
59  
60

1  
2  
3 adjustment for all demographic and socio-economic factors (OR 1.63, 95% CI 1.23-2.16; model 2,  
4 table 3). Maternal employment was associated with a slight reduction in the odds of breastfeeding  
5 discontinuation before 24 months (OR 0.77, 95% CI 0.60-0.99). There was no evidence that SLI  
6  
7 quintile was independently associated with breastfeeding discontinuation by 24 months. The  
8  
9 inclusion of urbanicity in the model did not alter the socio-economic estimates of effect.  
10  
11  
12

### 13 14 *Interaction effects*

15  
16  
17 There was no evidence of interaction between urbanicity and mother-level socio-economic factors  
18  
19 (household SLI and maternal education).  
20

### 21 22 *Random effects*

23  
24  
25 The random effects parameters for models investigating discontinuation of breastfeeding before 24  
26  
27 months are presented in table 3. In the null model (model 1) the proportion of residual variance  
28  
29 attributable to mothers (level 2, 53.7%) was much higher than the variance attributable to villages  
30  
31 (level 3, 8.5%). The addition of urbanicity to a model including individual and mother-level factors  
32  
33 resulted in a decrease of 8.5% in village-level variance.  
34  
35  
36  
37  
38  
39  
40  
41

## 42 **DISCUSSION**

### 43 44 **Summary of main findings**

45  
46  
47 In this study approximately two in three children were exclusively breastfed to six months and a  
48  
49 similar proportion breastfed to 24 months. At the village level, high urbanicity was associated with  
50  
51 breastfeeding discontinuation before 24 months, but there was no evidence that urbanicity was  
52  
53 associated with early termination of EBF. At the mother level, increased maternal education was  
54  
55 independently associated with both indicators of suboptimal breastfeeding, and high SLI associated  
56  
57  
58  
59  
60

1  
2  
3 with an increased odds of EBF for less than 6 months. Maternal employment showed a variable  
4  
5 association with breastfeeding. The residual variation in breastfeeding outcomes suggested greater  
6  
7 heterogeneity within-villages than between-villages.  
8  
9

### 10 11 12 **Consistency with previous studies**

13  
14  
15 Our estimates of breastfeeding prevalence are largely consistent with those derived from other  
16  
17 population-based studies in India. Early results from NFHS-4 (2015-16) report 67.3% of infants aged  
18  
19 0-6 months in Telangana are exclusively breastfed [19]. The overall proportion of children breastfed  
20  
21 until at least 24 months in our study was almost identical to an analysis of all-India NFHS-2 data:  
22  
23 (62.2% vs. 63%) [6].  
24  
25

26  
27 Very few existing studies have investigated the association between urbanicity and breastfeeding. In  
28  
29 one study based in the Philippines, Dahly et al. reported that length of breastfeeding was negatively  
30  
31 correlated with increasing urbanicity (using a multicomponent measure)[13]. The persisting  
32  
33 association between high urbanicity and increased odds of breastfeeding discontinuation <24 months  
34  
35 - after adjustment for lower level socio-economic circumstances - reported in our study support the  
36  
37 findings from Dahly et al.  
38  
39

40  
41 Increasing urbanicity is associated with positive socio-economic changes such as improved  
42  
43 education for women and increased income and household wealth. A number of other studies from  
44  
45 India and other LMICs have demonstrated a negative association between improved socio-economic  
46  
47 position and breastfeeding practices[6-8, 20-23]. We found similar results with regard to household  
48  
49 SLI and increased maternal education, and early termination of exclusive breastfeeding. One  
50  
51 explanation for this trend could be the greater affordability and/or social desirability of commercial  
52  
53 breast milk substitutes. The association between education and early termination of exclusive  
54  
55 breastfeeding was strongest for primary education (primary education OR 3.37, 95% CI 2.13-5.31;  
56  
57  
58  
59  
60

1  
2  
3 secondary education OR 1.69, 95% CI 1.12-2.54). This suggests that while education in general is  
4 associated with a reduction in the length of exclusive breastfeeding, higher levels of education  
5 partially ameliorate this effect. Interestingly, there was some evidence that maternal employment had  
6 a protective effect on breastfeeding discontinuation by 24 months, though the opposite trend was  
7 observed with regard to early cessation of EBF. There is some evidence of a U-shaped association  
8 between education and women's employment in India, with paid employment outside the home  
9 common among women with little or no formal education, lower among women with moderate  
10 levels of education, and rising again with high levels of education[24]. Mothers in employment are  
11 likely to be a heterogeneous group, making it difficult to draw any firm conclusions about the  
12 association between paid employment and breastfeeding practices in this sample.  
13  
14  
15  
16  
17  
18  
19  
20  
21  
22  
23  
24  
25  
26  
27  
28

### 29 **Strengths and limitations**

30  
31 The APCAPS cohort provides a unique opportunity to investigate current health behaviour and  
32 outcomes in a large cohort set against the backdrop of rapid urbanisation and economic transition in  
33 rural India. While studies based on the high level urban-rural comparison may help to predict the  
34 impact of 'total' urbanisation on breastfeeding practices, they obscure the temporal emergence of  
35 subtler changes in the urban environment which may be amenable to intervention. The use of  
36 multilevel models enabled us to explore the role of factors at different levels: individual, mother, and  
37 village.  
38  
39  
40  
41  
42  
43  
44  
45  
46

47 Although the vast majority of all under 6s in the study villages were included in our analysis, 15.7%  
48 (n=1,464) were excluded due to missing information on feeding history due to the mother living  
49 elsewhere, travelling, or deceased. In a comparison of included and excluded children there was no  
50 evidence that infant sex, infant age, number of under 6s living in the household, or household SLI  
51  
52  
53  
54  
55  
56  
57  
58  
59  
60

1  
2  
3 differed by missing status (supplementary table 1). A slightly higher proportion of excluded children  
4  
5 resided in high urbanicity villages (p 0.09).  
6

7  
8 We relied on maternal recall of breastfeeding events for our outcome measurement. The recall period  
9  
10 was short (<6 years) and a number of studies including those conducted in LMICs have confirmed  
11  
12 that such short-term recall is reliable, particularly for duration of breastfeeding[25, 26]  
13

14  
15 Our measure of urbanicity was derived from night-time light intensity data, information which is  
16  
17 objective, regularly updated and free to use. Additionally, data on night-time light intensity is  
18  
19 available over a number of years and could be used in future studies to investigate trends in  
20  
21 urbanicity over time. However, it must be noted that urbanicity is an ecological indicator and as such  
22  
23 may not accurately reflect individual environment, particularly given that many women may travel  
24  
25 regularly outside their home village for work or family reasons.  
26  
27  
28  
29  
30

### 31 **Implications**

32  
33  
34 Nearly a quarter (24%) of all global under-five deaths occur in India[27]. In light of the failure to  
35  
36 achieve the Millennium Development Goal infant mortality rate (IMR) target reduction [28], a new  
37  
38 target of reducing the IMR to 20 per 1,000 live births by 2020 has recently been proposed [29]. Early  
39  
40 results from the latest National Family Health Survey (NFHS-4) data collected in Telegana state  
41  
42 report a current IMR of 28 (20 in urban areas, 35 in rural areas) [19]. An increase in optimal  
43  
44 breastfeeding practices will help to achieve improvements in infant survival, in addition to reducing  
45  
46 the considerable burden of infant morbidity[3, 30]}. India faces an ever-increasing epidemic of  
47  
48 chronic disease in common with many other LMICs. Several studies have suggested that  
49  
50 breastfeeding has a protective effect on long-term outcomes such as obesity and diabetes in  
51  
52 adulthood[31], though residual confounding is difficult to exclude[32], and the most recent data from  
53  
54  
55  
56  
57  
58  
59  
60



1  
2  
3 the PROBIT RCT do not support an association between breastfeeding and adiposity in late  
4  
5 childhood[33].  
6

7  
8 A substantial proportion of infants in India are exclusively breastfed for less than the six months  
9  
10 recommended by WHO[7, 9, 10], and a recent study reported that there has been little change in the  
11  
12 prevalence of exclusive breastfeeding in India between 1992-1993 and 2005-2006[8 ]. The lack of  
13  
14 country-specific holistic and coordinated policy programmes supporting breastfeeding has also been  
15  
16 highlighted[34]. Therefore, research to further understand the determinants of suboptimal  
17  
18 breastfeeding practices in India is timely.  
19  
20

21  
22  
23  
24 Our findings suggest that in LMICs with a strong tradition of breastfeeding, negative changes in  
25  
26 breastfeeding behaviour may be observed during early stages of the urbanicity transition. Reduced  
27  
28 duration of breastfeeding among more educated mothers may be one of the earliest markers of this  
29  
30 change. India is currently undergoing rapid urbanisation, with the proportion of the population living  
31  
32 in towns and cities is set to increase from an estimated 28% in 2011 to 38% by 2026[35]. Many more  
33  
34 individuals live in areas which though traditionally described as rural are increasingly displaying  
35  
36 many of the characteristics of urban areas. There is good evidence that breastfeeding behaviours are  
37  
38 amenable to change through interventions delivered at the household and community level, as well  
39  
40 as those targeting health systems[36, 37]. Intervention programmes to protect and promote  
41  
42 breastfeeding should be considered in transitioning communities to counteract changes in  
43  
44 breastfeeding practices, preferably targeted at those mothers identified as most at risk of suboptimal  
45  
46 breastfeeding practices, preferably targeted at those mothers identified as most at risk of suboptimal  
47  
48 breastfeeding practices.  
49  
50  
51  
52  
53  
54  
55  
56  
57  
58  
59  
60

### Acknowledgements

We wish to acknowledge our dedicated field teams led by Santhi Bhogadi and the study participants who made this study possible. We also acknowledge the contribution of Naveen Chittaluri and Ekta Jain to data processing and management. We also thank Cono Ariti at the London School of Hygiene and Tropical Medicine (LSHTM) who provided statistical advice, and Poppy Mallinson (LSHTM) for assistance with calculating the standard of living index.

### Competing Interests

None declared.

### Source of funding

The APCAPS household survey was funded by a Wellcome Trust Strategic Award (Grant: 084674/Z, Principal Investigator Shah Ebrahim).

### Contributorship statement

The study was conceived and designed by Shah Ebrahim and VG, and overall study management was by VG, GKW, KVRK and SK. Study tools were developed by VG, GKW, and AA, and the study implemented by VG and GKW. Data management was provided by AA, GKW, SB and CB. SB was in charge of field management, SA and CB contributed to data collection and processing. RW obtained and processed the NTLI data. LO, CB, SA and SK designed the analysis reported here. LO performed the statistical analysis, SK helped interpret the results and provided crucial input on manuscript preparation. LO, CB and SK were responsible for the initial draft of the manuscript. All authors contributed to the revision of the manuscript and reviewed and approved the final version.

### Data sharing

For details on how to access APCAPS data, please visit <http://apcaps.lshtm.ac.uk>

## References

- 1 Bhutta ZA, Das JK, Rizvi A, *et al*. Evidence-based interventions for improvement of maternal and child nutrition: what can be done and at what cost? *The Lancet* 2013;**382**:452-77.
- 2 Haggerty PA, Rutstein SO. Breastfeeding and complementary infant feeding/postpartum effects (DHS Comparative Studies No. 30). Calverton, Maryland, USA 1999.
- 3 Victora CG, Bahl R, Barros AJD, *et al*. Breastfeeding in the 21st century: epidemiology, mechanisms, and lifelong effect. *The Lancet* 2016;**387**:475-90.
- 4 Cai X, Wardlaw T, Brown DW. Global trends in exclusive breastfeeding. *International Breastfeeding Journal* 2012;**7**:1-5.
- 5 Smith LC, Ruel MT, Ndiaye A. Why Is Child Malnutrition Lower in Urban Than in Rural Areas? Evidence from 36 Developing Countries. *World Development* 2005;**33**:1285-305.
- 6 Malhotra R, Noheria A, Amir O, *et al*. Determinants of termination of breastfeeding within the first 2 years of life in India: evidence from the National Family Health Survey-2. *Maternal and Child Nutrition* 2008;**4**:181-93.
- 7 Patel A, Badhoniya N, Khadse S, *et al*. Infant and young child feeding indicators and determinants of poor feeding practices in India: secondary data analysis of National Family Health Survey 2005-06. *Food & Nutrition Bulletin* 2010;**31**:314-33.
- 8 Chandhiok N, Singh KJ, Sahu D, *et al*. Changes in exclusive breastfeeding practices and its determinants in India, 1992–2006: analysis of national survey data. *International Breastfeeding Journal* 2015;**10**:1-13.
- 9 Meshram II, Laxmaiah A, Venkaiah K, *et al*. Impact of feeding and breastfeeding practices on the nutritional status of infants in a district of Andhra Pradesh, India. *National Medical Journal of India* 2012;**25**:201-6.
- 10 Srivastava NM, Awasthi S. Breastfeeding practices for newborns among urban poor in Lucknow, northern India: A prospective follow-up study. *Clinical Epidemiology and Global Health* 2014;**2**.
- 11 Noor AM, Alegana VA, Gething PW, *et al*. Using remotely sensed night-time light as a proxy for poverty in Africa. *Population Health Metrics* 2008;**6**:1-13.
- 12 Tatem AJ, Hay SI. Measuring urbanization pattern and extent for malaria research: a review of remote sensing approaches. *J Urban Health* 2004;**81**:363-76.
- 13 Dahly DL, Adair LS. Quantifying the urban environment: A scale measure of urbanicity outperforms the urban–rural dichotomy. *Social Science & Medicine* 2007;**64**:1407-19.
- 14 Cyril S, Oldroyd J, Renzaho A. Urbanisation, urbanicity, and health: a systematic review of the reliability and validity of urbanicity scales. *BMC Public Health* 2013;**13**:513.
- 15 Kinra S, Radha Krishna K, Kuper H, *et al*. Cohort Profile: Andhra Pradesh Children and Parents Study (APCAPS). *International Journal of Epidemiology* 2013;**43**:1417-24.
- 16 World Health Organization. Infant and young child nutrition: Global Strategy for Infant and Young Child Feeding. Geneva: World Health Organization 2003.
- 17 Filmer D, Pritchett L. Estimating Wealth Effects Without Expenditure Data—Or Tears: An Application To Educational Enrollments In States Of India. *Demography* 2001;**38**:115-32.
- 18 Vyas S, Kumaranayake L. Constructing socio-economic status indices: how to use principal components analysis. *Health Policy and Planning* 2006;**21**:459-68.
- 19 International Institute for Population Sciences, Mumbai. National Family Health Survey-4 (2015-16): Telegana State Factsheet. 2016 [accessed 21 April 2016]; [http://rchiips.org/nfhs/pdf/NFHS4/TG\\_FactSheet.pdf](http://rchiips.org/nfhs/pdf/NFHS4/TG_FactSheet.pdf)
- 20 Nath DC, Goswami G. Determinants of breast-feeding patterns in an urban society of India. *Human Biology* 1997;**69**:557-73.
- 21 Senarath U, Agho KE, Akram DE, *et al*. Comparisons of complementary feeding indicators and associated factors in children aged 6-23 months across five South Asian countries. *Maternal & Child Nutrition* 2012;**8 (Suppl 1)**:89-106.

- 1  
2  
3 22 Senarath U, Dibley MJ, Agho KE. Factors Associated With Nonexclusive Breastfeeding in Five East and  
4 Southeast Asian Countries: A Multilevel Analysis. *Journal of Human Lactation* 2010;**26**.
- 5 23 Grummer-Strawn LM. The Effect of Changes in Population Characteristics on Breastfeeding Trends in  
6 Fifteen Developing Countries. *International Journal of Epidemiology* 1996;**25**:94-102.
- 7 24 Kapsos S, Silberman A, Bourmpoula E. Why is female labour force participation declining so sharply  
8 in India? (ILO Research Paper No.10). International Labour Office 2014.
- 9 25 Li R, Scanlon KS, Serdula MK. The Validity and Reliability of Maternal Recall of Breastfeeding Practice.  
10 *Nutrition Reviews* 2005;**63**:103-10.
- 11 26 World Health Organization. Indicators for assessing infant and young child feeding practices: Part 1 -  
12 Definitions. Geneva: WHO 2008.
- 13 27 United Nations Inter-agency Group for Child Mortality Estimation. Levels & Trends in Child Mortality:  
14 Report 2012. New York: United Nations Children's Fund 2012.
- 15 28 You D, Hug L, Ejdemyr S, *et al*. Global, regional, and national levels and trends in under-5 mortality  
16 between 1990 and 2015, with scenario-based projections to 2030: a systematic analysis by the UN Inter-  
17 agency Group for Child Mortality Estimation. *The Lancet* 2015;**386**:2275-86.
- 18 29 Sachidananda Kamath S. Reducing the Infant Mortality Rate of India to 20 by 2020: Together we can  
19 do. *Indian Pediatrics* 2015;**52**.
- 20 30 Neovita Study Group. Timing of initiation, patterns of breastfeeding, and infant survival: prospective  
21 analysis of pooled data from three randomised trials. *The Lancet Global Health* 2016;**4**:e266-e75.
- 22 31 Horta BL, Loret de Mola C, Victora CG. Long-term consequences of breastfeeding on cholesterol,  
23 obesity, systolic blood pressure and type 2 diabetes: a systematic review and meta-analysis. *Acta Paediatrica*  
24 2015;**104**:30-7.
- 25 32 Brion M-JA, Lawlor DA, Matijasevich A, *et al*. What are the causal effects of breastfeeding on IQ,  
26 obesity and blood pressure? Evidence from comparing high-income with middle-income cohorts.  
27 *International Journal of Epidemiology* 2011.
- 28 33 Martin RM, Patel R, Kramer MS, *et al*. Effects of promoting longer-term and exclusive breastfeeding  
29 on adiposity and insulin-like growth factor-i at age 11.5 years: A randomized trial. *JAMA* 2013;**309**:1005-13.
- 30 34 Gupta A, Dadhich JP, Faridi MMA. Breastfeeding and complementary feeding as a public health  
31 intervention for child survival in India. *Indian J Pediatr* 2010;**77**:413-8.
- 32 35 Census of India 2011. Population Projections for India and States 2001-2026: Report of the Technical  
33 Group on Population Projections Constituted by the National Commission on Population. New Delhi: Office  
34 of the Registrar General and Census Commissioner 2006.
- 35 36 Renfrew MJ, McCormick FM, Wade A, *et al*. Support for healthy breastfeeding mothers with healthy  
36 term babies. *The Cochrane database of systematic reviews* 2012;**5**:CD001141-CD.
- 37 37 Rollins NC, Bhandari N, Hajeebhoy N, *et al*. Why invest, and what it will take to improve  
38 breastfeeding practices? *The Lancet* 2016;**387**:491-504.
- 39  
40  
41  
42  
43  
44  
45  
46  
47  
48  
49  
50  
51  
52  
53  
54  
55  
56  
57  
58  
59  
60

Figure 1. Model of the association between village level urbanicity, individual level socio-economic indicators, and breastfeeding practices

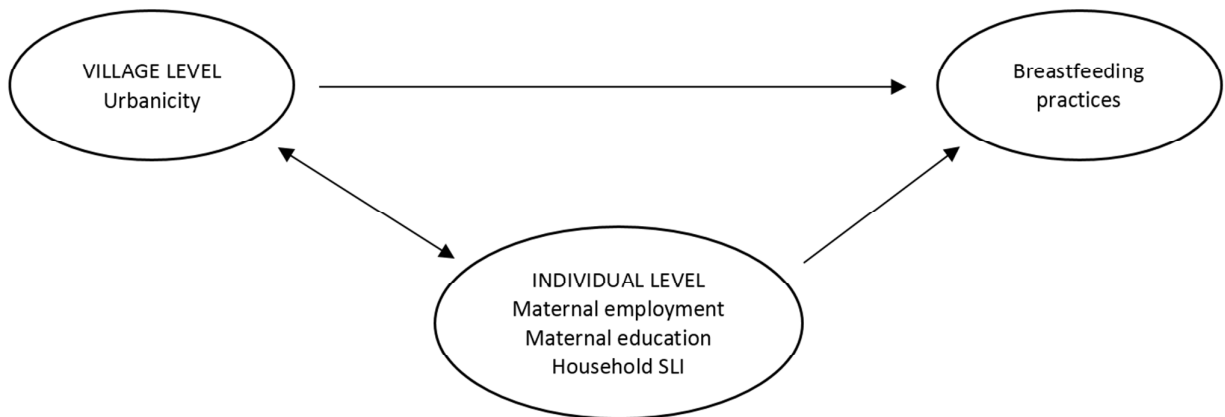

Peer review only

Figure 2. Flowchart of how samples for the two breastfeeding indicators were reached

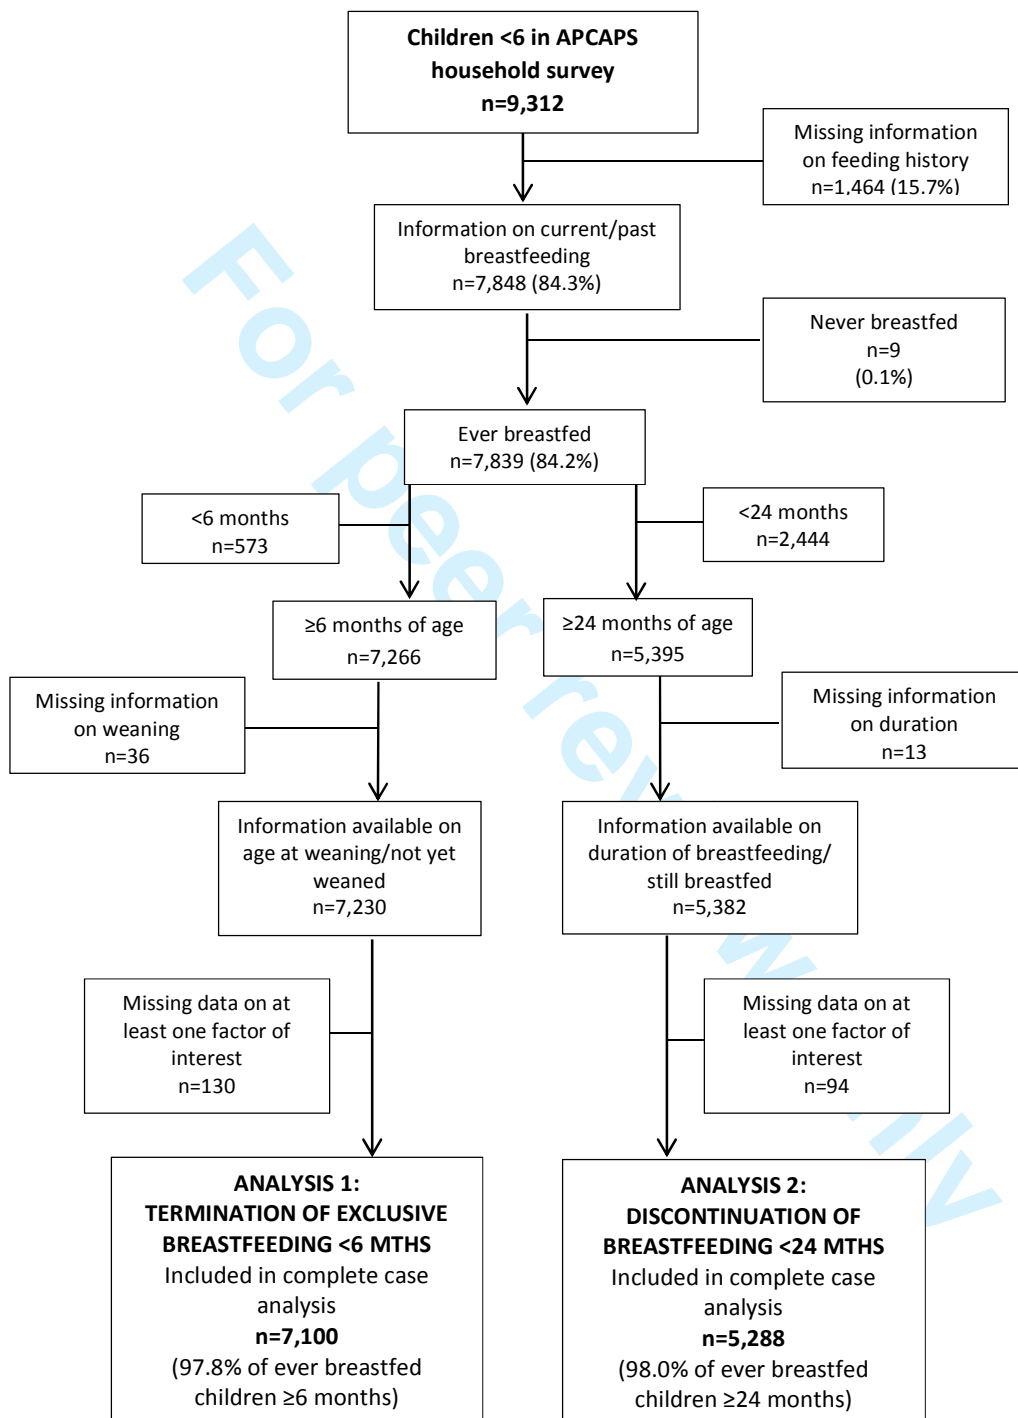

Table 1. Characteristics of ever breastfed children under 6 in the APCAPS household survey, by village urbanicity tertile (n=7839)

|                                       |                         | Urbanicity<br>(measured by night-time light intensity) |        |                                 |        |                              |        | ALL  |        |
|---------------------------------------|-------------------------|--------------------------------------------------------|--------|---------------------------------|--------|------------------------------|--------|------|--------|
|                                       |                         | HIGH<br>tertile 1<br>(n=4276)                          |        | MEDIUM<br>tertile 2<br>(n=2082) |        | LOW<br>tertile 3<br>(n=1476) |        |      |        |
|                                       |                         | n                                                      | (%)    | n                               | (%)    | n                            | (%)    | n    | (%)    |
| <b>Exclusive breastfeeding</b>        | Yes                     | 2495                                                   | (63.5) | 1400                            | (72.8) | 915                          | (66.4) | 4810 | (66.5) |
|                                       | ≥6 months <sup>1</sup>  | 1436                                                   | (36.5) | 522                             | (27.2) | 462                          | (33.6) | 2420 | (33.5) |
| <b>Continued breastfeeding</b>        | Yes                     | 1701                                                   | (57.9) | 927                             | (65.0) | 717                          | (70.4) | 3345 | (62.2) |
|                                       | ≥24 months <sup>2</sup> | 1236                                                   | (42.1) | 499                             | (35.0) | 302                          | (29.6) | 2037 | (37.8) |
| <b>Infant sex</b>                     | Male                    | 2189                                                   | (51.2) | 1069                            | (51.2) | 748                          | (50.5) | 4006 | (51.1) |
|                                       | Female                  | 2087                                                   | (48.8) | 1013                            | (48.7) | 733                          | (49.5) | 3833 | (48.9) |
| <b>Age of child at survey</b>         | 0-1                     | 1337                                                   | (31.3) | 650                             | (31.2) | 457                          | (30.9) | 2444 | (31.2) |
|                                       | 2-3                     | 1520                                                   | (35.5) | 718                             | (34.5) | 535                          | (36.1) | 2773 | (35.4) |
|                                       | 4-5                     | 1419                                                   | (33.2) | 714                             | (34.3) | 489                          | (33.0) | 2622 | (33.4) |
| <b>Birth order</b>                    | 1                       | 1824                                                   | (43.1) | 883                             | (42.7) | 607                          | (41.0) | 3314 | (42.6) |
|                                       | 2                       | 1667                                                   | (39.4) | 798                             | (38.6) | 588                          | (39.8) | 3053 | (39.2) |
|                                       | ≥3                      | 743                                                    | (17.5) | 389                             | (18.8) | 284                          | (19.2) | 1416 | (18.2) |
|                                       | missing                 | 42                                                     |        | 12                              |        | 2                            |        | 56   |        |
|                                       | mean (SD)               | 1.79                                                   | (0.85) | 1.80                            | (0.85) | 1.82                         | (0.85) | 1.80 | (0.85) |
| <b>Age of mother at birth</b>         | <20                     | 737                                                    | (17.3) | 364                             | (17.6) | 276                          | (18.6) | 1377 | (17.6) |
|                                       | 20-24                   | 2410                                                   | (56.5) | 1238                            | (59.6) | 862                          | (57.7) | 4510 | (57.7) |
|                                       | 25-29                   | 917                                                    | (22.1) | 393                             | (19.0) | 288                          | (20.2) | 1598 | (20.2) |
|                                       | 30+                     | 198                                                    | (44.6) | 78                              | (3.8)  | 54                           | (3.6)  | 330  | (4.2)  |
|                                       | missing                 | 14                                                     |        | 9                               |        | 1                            |        | 24   |        |
|                                       | mean (SD)               | 22.9                                                   | (3.6)  | 22.7                            | (3.4)  | 22.7                         | (3.5)  | 22.8 | (3.5)  |
| <b>Family structure</b>               | Nuclear                 | 2866                                                   | (67.6) | 1306                            | (63.7) | 942                          | (64.0) | 5114 | (65.9) |
|                                       | Joint/extended          | 1371                                                   | (32.4) | 745                             | (36.3) | 530                          | (36.0) | 2646 | (34.1) |
|                                       | missing                 | 39                                                     |        | 31                              |        | 9                            |        | 79   |        |
| <b>Maternal education</b>             | No formal schooling     | 1054                                                   | (24.7) | 663                             | (32.0) | 558                          | (37.7) | 2275 | (29.1) |
|                                       | Primary                 | 880                                                    | (20.6) | 390                             | (18.8) | 284                          | (19.2) | 1554 | (19.9) |
|                                       | Secondary+              | 2329                                                   | (54.6) | 1022                            | (49.3) | 638                          | (43.1) | 3989 | (51.0) |
|                                       | missing                 | 13                                                     |        | 7                               |        | 1                            |        | 21   |        |
| <b>Maternal employment</b>            | Not working             | 3144                                                   | (73.8) | 1342                            | (64.7) | 815                          | (55.0) | 5301 | (67.8) |
|                                       | Working                 | 1119                                                   | (26.2) | 733                             | (35.3) | 666                          | (45.0) | 2518 | (32.2) |
|                                       | missing                 | 13                                                     |        | 7                               |        | 0                            |        | 20   |        |
| <b>Standard of living (SLI) index</b> | Poorest                 | 611                                                    | (14.3) | 318                             | (15.3) | 242                          | (16.3) | 1171 | (14.9) |
|                                       | Poorer                  | 736                                                    | (17.2) | 422                             | (20.3) | 288                          | (19.4) | 1446 | (18.5) |
|                                       | Middle                  | 816                                                    | (19.1) | 458                             | (22.0) | 378                          | (25.5) | 1652 | (21.1) |
|                                       | Richer                  | 964                                                    | (22.5) | 497                             | (23.9) | 314                          | (21.2) | 1775 | (22.6) |
|                                       | Richest                 | 1148                                                   | (26.9) | 386                             | (18.5) | 259                          | (17.5) | 1793 | (22.9) |
|                                       | missing                 | 1                                                      |        | 1                               |        | 0                            |        | 2    |        |

<sup>1</sup>Restricted to ever breastfed infants aged at least 6 months not yet weaned/with age at weaning (n=7230)<sup>2</sup>Restricted to ever breastfed infants aged at least 24 months still breastfed/with age at cessation of breastfeeding (n=5382)<sup>3</sup>chi-square test of independence for association with urbanicity

Table 2. Results of multilevel logistic regression models for the association between urbanicity or individual/household socio-economic factors and termination of exclusive breastfeeding <6 months, among ever-breastfed children under 6 in the APCAPS household survey<sup>1</sup>

|                                       |                                               | Termination of exclusive breastfeeding <6 months (n=7100) |        |                   |              |                                         |          |                                                |              |                                                            |              |
|---------------------------------------|-----------------------------------------------|-----------------------------------------------------------|--------|-------------------|--------------|-----------------------------------------|----------|------------------------------------------------|--------------|------------------------------------------------------------|--------------|
|                                       |                                               | Unadjusted                                                |        | Model 1<br>(null) |              | Model 2<br>(L1 confounders<br>+ L2 SES) |          | Model 3<br>(L1 confounders<br>+ L3 urbanicity) |              | Model 4<br>(L1 confounders<br>+ L2 SES<br>+ L3 urbanicity) |              |
|                                       |                                               | n                                                         | (%)    | OR                | (95% CI)     | OR                                      | (95% CI) | OR                                             | (95% CI)     | OR                                                         | (95% CI)     |
| <b>FIXED EFFECTS</b>                  |                                               |                                                           |        |                   |              |                                         |          |                                                |              |                                                            |              |
| <b>Maternal education</b>             | No formal schooling                           | 615                                                       | (29.1) | ref               |              | ref                                     |          | ref                                            |              | ref                                                        |              |
|                                       | Primary                                       | 534                                                       | (38.6) | 3.42              | (2.23, 5.25) |                                         |          | 3.37                                           | (2.13, 5.31) | 3.36                                                       | (2.13, 5.30) |
|                                       | Secondary+                                    | 1231                                                      | (38.2) | 1.82              | (1.29, 2.57) |                                         |          | 1.69                                           | (1.12, 2.54) | 1.69                                                       | (1.12, 2.54) |
| <b>Maternal employment</b>            | Not working                                   | 1584                                                      | (33.5) | ref               |              | ref                                     |          | ref                                            |              | ref                                                        |              |
|                                       | Working                                       | 796                                                       | (33.7) | 0.94              | (0.69, 1.28) |                                         |          | 1.43                                           | (1.00, 2.03) | 1.43                                                       | (1.00-2.04)  |
| <b>Standard of living (SLI) index</b> | Poorest                                       | 280                                                       | (26.8) | ref               |              | ref                                     |          | ref                                            |              | ref                                                        |              |
|                                       | Poorer                                        | 432                                                       | (32.9) | 1.80              | (1.07, 3.02) |                                         |          | 1.65                                           | (0.97, 2.81) | 1.66                                                       | (0.98, 2.82) |
|                                       | Middle                                        | 525                                                       | (35.1) | 2.24              | (1.36, 3.71) |                                         |          | 2.08                                           | (1.24, 3.50) | 2.09                                                       | (1.24, 3.51) |
|                                       | Richer                                        | 564                                                       | (35.1) | 2.19              | (1.33, 3.59) |                                         |          | 1.98                                           | (1.17, 3.34) | 1.99                                                       | (1.18, 3.35) |
|                                       | Richest                                       | 579                                                       | (35.3) | 2.22              | (1.35, 3.65) |                                         |          | 2.11                                           | (1.22, 3.63) | 2.11                                                       | (1.23, 3.64) |
|                                       | <i>trend<sup>2</sup> (p value)</i>            |                                                           |        | 0.004             |              | 0.003                                   |          | 0.003                                          |              | 0.015                                                      |              |
| <b>Urbanicity</b>                     | Low                                           | 459                                                       | (33.7) | ref               |              | ref                                     |          | ref                                            |              | ref                                                        |              |
|                                       | Medium                                        | 517                                                       | (27.5) | 0.49              | (0.15, 1.56) |                                         |          | 0.48                                           | (0.15, 1.54) | 0.48                                                       | (0.15, 1.51) |
|                                       | High                                          | 1404                                                      | (36.4) | 1.10              | (0.35, 3.45) |                                         |          | 1.09                                           | (0.34, 3.43) | 1.04                                                       | (0.34, 3.20) |
|                                       |                                               | <i>trend<sup>2</sup> (p value)</i>                        |        |                   | 0.87         |                                         | 0.89     |                                                | 0.89         |                                                            | 0.91         |
| <b>RANDOM EFFECTS</b>                 |                                               |                                                           |        |                   |              |                                         |          |                                                |              |                                                            |              |
| Level 2 (mothers)                     | <i>variance (SE)</i>                          |                                                           |        | 13.6194 (1.2202)  |              | 13.9036 (1.2454)                        |          | 13.9888 (1.2531)                               |              | 13.9072 1.2456                                             |              |
|                                       | <i>PCV (compared to null)<sup>3</sup> (%)</i> |                                                           |        | ref               |              | -2.09%                                  |          | -2.71%                                         |              | -2.11%                                                     |              |
| Level 3 (villages)                    | <i>variance (SE)</i>                          |                                                           |        | 1.4949 (0.4712)   |              | 1.4429 (0.4574)                         |          | 1.3870 (0.4427)                                |              | 1.3200 0.4235                                              |              |
|                                       | <i>PCV (compared to null)<sup>3</sup> (%)</i> |                                                           |        | ref               |              | 3.48%                                   |          | 7.22%                                          |              | 11.70%                                                     |              |
|                                       | <i>PCV (compared to model 2)<sup>4</sup></i>  |                                                           |        | -                 |              | ref                                     |          | -                                              |              | 8.52%                                                      |              |

<sup>1</sup>All ORs calculated using multilevel modelling and complete case sample (see Figure 2)<sup>2</sup>Test for trend: p value including variable as linear<sup>3</sup>Proportional Change in Variance ((model 1 variance – model X variance)/model 1 variance)\*100%<sup>4</sup>Proportional Change in Variance ((model 2 variance – model 4 variance)/model 2 variance)\*100%



Table 3. Results of multilevel logistic regression models for the association between urbanicity or individual/household socio-economic factors and discontinuation of continued breastfeeding <24 months, among ever-breastfed children under 6 in the APCAPS household survey<sup>1</sup>

| Discontinuation of breastfeeding <24 months (n=5288) |                                    |            |        |                   |              |                                         |          |                                                |              |                                                            |              |         |          |
|------------------------------------------------------|------------------------------------|------------|--------|-------------------|--------------|-----------------------------------------|----------|------------------------------------------------|--------------|------------------------------------------------------------|--------------|---------|----------|
|                                                      |                                    | Unadjusted |        | Model 1<br>(null) |              | Model 2<br>(L1 confounders<br>+ L2 SES) |          | Model 3<br>(L1 confounders<br>+ L3 urbanicity) |              | Model 4<br>(L1 confounders<br>+ L2 SES<br>+ L3 urbanicity) |              |         |          |
|                                                      |                                    | n          | (%)    | OR                | (95% CI)     | OR                                      | (95% CI) | OR                                             | (95% CI)     | OR                                                         | (95% CI)     |         |          |
| <b>FIXED EFFECTS</b>                                 |                                    |            |        |                   |              |                                         |          |                                                |              |                                                            |              |         |          |
| <b>Maternal education</b>                            | No formal schooling                | 521        | (30.7) | ref               |              | ref                                     |          | ref                                            |              | ref                                                        |              |         |          |
|                                                      | Primary                            | 395        | (37.3) | 1.48              | (1.13, 1.94) |                                         |          | 1.21                                           | (0.88, 1.65) | 1.21                                                       | (0.88, 1.65) |         |          |
|                                                      | Secondary+                         | 1079       | (42.5) | 2.28              | (1.82, 2.87) |                                         |          | 1.63                                           | (1.23, 2.16) | 1.62                                                       | (1.22, 2.15) |         |          |
| <b>Maternal employment</b>                           | Not working                        | 1384       | (41.3) | ref               |              | ref                                     |          | ref                                            |              | ref                                                        |              |         |          |
|                                                      | Working                            | 611        | (31.6) | 0.55              | (0.45, 0.67) |                                         |          | 0.77                                           | (0.60, 0.99) | 0.78                                                       | (0.61, 0.99) |         |          |
| <b>Standard of (SLI) index</b>                       | Poorest                            | 271        | (34.6) | ref               |              | ref                                     |          | ref                                            |              | ref                                                        |              |         |          |
|                                                      | Poorer                             | 370        | (37.3) | 1.38              | (0.99, 1.91) |                                         |          | 1.18                                           | (0.82, 1.69) | 1.17                                                       | (0.82, 1.68) |         |          |
|                                                      | Middle                             | 374        | (33.1) | 1.07              | (0.78, 1.48) |                                         |          | 0.86                                           | (0.60, 1.24) | 0.86                                                       | (0.60, 1.23) |         |          |
|                                                      | Richer                             | 467        | (39.4) | 1.5               | (1.09, 2.06) |                                         |          | 1.05                                           | (0.73, 1.51) | 1.04                                                       | (0.73, 1.50) |         |          |
|                                                      | Richest                            | 513        | (42.9) | 1.75              | (1.28, 2.41) |                                         |          | 1.09                                           | (0.74, 1.59) | 1.08                                                       | (0.74, 1.57) |         |          |
| <i>trend<sup>2</sup> (p value)</i>                   |                                    |            |        | 0.001             |              | 0.027                                   |          | 0.915                                          |              |                                                            |              |         |          |
| <b>Urbanicity</b>                                    | Low                                | 290        | (29.5) | ref               |              | ref                                     |          | ref                                            |              | ref                                                        |              |         |          |
|                                                      | Medium                             | 494        | (34.6) | 1.40              | (0.72, 2.71) |                                         |          | 1.45                                           | (0.71, 2.96) | 1.35                                                       | (0.66, 2.79) |         |          |
|                                                      | High                               | 1213       | (42.2) | 2.74              | (1.42, 5.28) |                                         |          | 2.96                                           | (1.45, 6.05) | 2.64                                                       | (1.29, 5.42) |         |          |
|                                                      | <i>trend<sup>2</sup> (p value)</i> |            |        |                   | 0.003        |                                         | 0.003    |                                                | 0.008        |                                                            | 0.008        |         |          |
| <b>RANDOM EFFECTS</b>                                |                                    |            |        |                   |              |                                         |          |                                                |              |                                                            |              |         |          |
| Level 2 (mothers) <i>variance (SE)</i>               |                                    |            |        |                   |              | 3.2070                                  | (0.4847) | 4.1838                                         | (0.6347)     | 4.2895                                                     | (0.6445)     | 4.1793  | (0.6342) |
| <i>PCV (compared to null)<sup>3</sup> (%)</i>        |                                    |            |        |                   |              | ref                                     |          | -30.46%                                        |              | -33.75%                                                    |              | -30.32% |          |
| Level 3 (villages) <i>variance (SE)</i>              |                                    |            |        |                   |              | 0.6036                                  | (0.1966) | 0.6677                                         | (0.2221)     | 0.4942                                                     | (0.1718)     | 0.5029  | (0.1739) |
| <i>PCV (compared to null)<sup>3</sup> (%)</i>        |                                    |            |        |                   |              | ref                                     |          | -10.62%                                        |              | 18.12%                                                     |              | 16.68%  |          |
| <i>PCV (compared to model 2)<sup>4</sup></i>         |                                    |            |        |                   |              | -                                       |          | ref                                            |              | -                                                          |              | 24.68%  |          |

<sup>1</sup>All ORs calculated using multilevel modelling and complete case sample (see Figure 2)

<sup>2</sup>Test for trend: p value including variable as linear

<sup>3</sup>Proportional Change in Variance ((model 1 variance – model X variance)/model 1 variance)\*100%

<sup>4</sup>Proportional Change in Variance ((model 2 variance – model 4 variance)/model 2 variance)\*100%

Supplementary table 1. Characteristics of children under 6 in the APCAPS household survey, by missing/non-missing information on breastfeeding history (n=9,312)

|                                          |                | Children <6 years (n=9,312)                         |            |                           |            |                |
|------------------------------------------|----------------|-----------------------------------------------------|------------|---------------------------|------------|----------------|
|                                          |                | Information on current/past breastfeeding available |            |                           |            |                |
|                                          |                | Yes (non-missing)<br>(n=7,848)                      |            | No (missing)<br>(n=1,464) |            | <i>p value</i> |
|                                          |                | <b>n</b>                                            | <b>(%)</b> | <b>n</b>                  | <b>(%)</b> |                |
| <b>INDIVIDUAL LEVEL</b>                  |                |                                                     |            |                           |            |                |
| <b>Infant sex</b>                        | Male           | 4011                                                | (51.1)     | 773                       | (52.8)     | 0.23           |
|                                          | Female         | 3837                                                | (48.9)     | 691                       | (47.2)     |                |
| <b>Age of infant</b>                     | 0-1            | 2445                                                | (31.2)     | 445                       | (30.4)     | 0.36           |
|                                          | 2-3            | 2776                                                | (35.4)     | 501                       | (34.2)     |                |
|                                          | 4-5            | 2627                                                | (33.5)     | 518                       | (35.4)     |                |
| <b>HOUSEHOLD LEVEL</b>                   |                |                                                     |            |                           |            |                |
| <b>Number of under 6s in household</b>   | 1              | 3192                                                | (40.7)     | 616                       | (42.1)     | 0.71           |
|                                          | 2              | 3846                                                | (49.0)     | 702                       | (48.0)     |                |
|                                          | ≥3             | 810                                                 | (10.3)     | 146                       | (10.0)     |                |
| <b>Standard of living (SLI) index</b>    | Poorest        | 1172                                                | (14.9)     | 145                       | (15.5)     | 0.37           |
|                                          | Poorer         | 1447                                                | (18.4)     | 176                       | (18.8)     |                |
|                                          | Middle         | 1654                                                | (21.1)     | 211                       | (22.5)     |                |
|                                          | Richer         | 1777                                                | (22.6)     | 185                       | (19.8)     |                |
|                                          | Richest        | 1796                                                | (22.9)     | 219                       | (23.4)     |                |
|                                          | <i>Missing</i> | 2                                                   |            | 528                       |            |                |
| <b>VILLAGE LEVEL</b>                     |                |                                                     |            |                           |            |                |
| <b>Night-time light intensity (NTLI)</b> | Low            | 1484                                                | (18.9)     | 271                       | (18.5)     | 0.09           |
|                                          | Medium         | 2086                                                | (26.6)     | 353                       | (24.1)     |                |
|                                          | High           | 4278                                                | (54.5)     | 840                       | (57.4)     |                |

## STROBE Statement—checklist of items that should be included in reports of observational studies

|                           | Item No | Recommendation                                                                                                                                                                                                                                                                                                                                                                                                                                                         | Location in manuscript                                                                    |
|---------------------------|---------|------------------------------------------------------------------------------------------------------------------------------------------------------------------------------------------------------------------------------------------------------------------------------------------------------------------------------------------------------------------------------------------------------------------------------------------------------------------------|-------------------------------------------------------------------------------------------|
| <b>Title and abstract</b> | 1       | (a) Indicate the study's design with a commonly used term in the title or the abstract                                                                                                                                                                                                                                                                                                                                                                                 | <i>In abstract (cross-sectional survey), page 2</i>                                       |
|                           |         | (b) Provide in the abstract an informative and balanced summary of what was done and what was found                                                                                                                                                                                                                                                                                                                                                                    | <i>Done, page 2.</i>                                                                      |
| <b>Introduction</b>       |         |                                                                                                                                                                                                                                                                                                                                                                                                                                                                        |                                                                                           |
| Background/rationale      | 2       | Explain the scientific background and rationale for the investigation being reported                                                                                                                                                                                                                                                                                                                                                                                   | <i>Done, pages 4-5.</i>                                                                   |
| Objectives                | 3       | State specific objectives, including any prespecified hypotheses                                                                                                                                                                                                                                                                                                                                                                                                       | <i>Done (objective in Introduction page 5, hypothesis in Methods page 8)</i>              |
| <b>Methods</b>            |         |                                                                                                                                                                                                                                                                                                                                                                                                                                                                        |                                                                                           |
| Study design              | 4       | Present key elements of study design early in the paper                                                                                                                                                                                                                                                                                                                                                                                                                | <i>Done, pages 5-6.</i>                                                                   |
| Setting                   | 5       | Describe the setting, locations, and relevant dates, including periods of recruitment, exposure, follow-up, and data collection                                                                                                                                                                                                                                                                                                                                        | <i>Done, pages 5-6.</i>                                                                   |
| Participants              | 6       | (a) <i>Cohort study</i> —Give the eligibility criteria, and the sources and methods of selection of participants. Describe methods of follow-up<br><i>Case-control study</i> —Give the eligibility criteria, and the sources and methods of case ascertainment and control selection. Give the rationale for the choice of cases and controls<br><i>Cross-sectional study</i> —Give the eligibility criteria, and the sources and methods of selection of participants | <i>Done, pages 5-6, 8-9 (please also see Fig 2)</i>                                       |
|                           |         | (b) <i>Cohort study</i> —For matched studies, give matching criteria and number of exposed and unexposed<br><i>Case-control study</i> —For matched studies, give matching criteria and the number of controls per case                                                                                                                                                                                                                                                 |                                                                                           |
| Variables                 | 7       | Clearly define all outcomes, exposures, predictors, potential confounders, and effect modifiers. Give diagnostic criteria, if applicable                                                                                                                                                                                                                                                                                                                               | <i>Done, pages 6-9.</i>                                                                   |
| Data sources/measurement  | 8*      | For each variable of interest, give sources of data and details of methods of assessment (measurement). Describe comparability of assessment methods if there is more than one group                                                                                                                                                                                                                                                                                   | <i>Done, pages 6-8.</i>                                                                   |
| Bias                      | 9       | Describe any efforts to address potential sources of bias                                                                                                                                                                                                                                                                                                                                                                                                              | <i>Done, pages 7-8, 14-15.</i>                                                            |
| Study size                | 10      | Explain how the study size was arrived at                                                                                                                                                                                                                                                                                                                                                                                                                              | <i>N/A (secondary analysis)</i>                                                           |
| Quantitative variables    | 11      | Explain how quantitative variables were handled in the analyses. If applicable, describe which groupings were chosen and why                                                                                                                                                                                                                                                                                                                                           | <i>Done, pages 6-9.</i>                                                                   |
| Statistical methods       | 12      | (a) Describe all statistical methods, including those used to control for confounding                                                                                                                                                                                                                                                                                                                                                                                  | <i>Done, pages 8-9.</i>                                                                   |
|                           |         | (b) Describe any methods used to examine subgroups and interactions                                                                                                                                                                                                                                                                                                                                                                                                    | <i>Done, page 9.</i>                                                                      |
|                           |         | (c) Explain how missing data were addressed                                                                                                                                                                                                                                                                                                                                                                                                                            | <i>Done (end of para 1 'Statistical analysis' page 8, also see Supplementary Table 1)</i> |
|                           |         | (d) <i>Cohort study</i> —If applicable, explain how loss to follow-up was                                                                                                                                                                                                                                                                                                                                                                                              |                                                                                           |

1  
2  
3  
4  
5  
6  
7  
8  
9  
10  
11  
12  
13  
14  
15  
16  
17  
18  
19  
20  
21  
22  
23  
24  
25  
26  
27  
28  
29  
30  
31  
32  
33  
34  
35  
36  
37  
38  
39  
40  
41  
42  
43  
44  
45  
46  
47  
48  
49  
50  
51  
52  
53  
54  
55  
56  
57  
58  
59  
60

addressed  
*Case-control study*—If applicable, explain how matching of cases and controls was addressed  
*Cross-sectional study*—If applicable, describe analytical methods *N/A*  
taking account of sampling strategy  

---

*(g)* Describe any sensitivity analyses

Continued on next page

For peer review only

| <b>Results</b>           |     | <b>Location in manuscript</b>                                                                                                                                                                                |                                          |
|--------------------------|-----|--------------------------------------------------------------------------------------------------------------------------------------------------------------------------------------------------------------|------------------------------------------|
| Participants             | 13* | (a) Report numbers of individuals at each stage of study—eg numbers potentially eligible, examined for eligibility, confirmed eligible, included in the study, completing follow-up, and analysed            | <i>Done, page 9 and Figure 2.</i>        |
|                          |     | (b) Give reasons for non-participation at each stage                                                                                                                                                         | <i>Done, Figure 2.</i>                   |
|                          |     | (c) Consider use of a flow diagram                                                                                                                                                                           | <i>Provided (Figure 2).</i>              |
| Descriptive data         | 14* | (a) Give characteristics of study participants (eg demographic, clinical, social) and information on exposures and potential confounders                                                                     | <i>Done, Table 1.</i>                    |
|                          |     | (b) Indicate number of participants with missing data for each variable of interest                                                                                                                          | <i>Done, Table 1.</i>                    |
|                          |     | (c) <i>Cohort study</i> —Summarise follow-up time (eg, average and total amount)                                                                                                                             |                                          |
| Outcome data             | 15* | <i>Cohort study</i> —Report numbers of outcome events or summary measures over time                                                                                                                          |                                          |
|                          |     | <i>Case-control study</i> —Report numbers in each exposure category, or summary measures of exposure                                                                                                         |                                          |
|                          |     | <i>Cross-sectional study</i> —Report numbers of outcome events or summary measures                                                                                                                           | <i>Done, Table 1.</i>                    |
| Main results             | 16  | (a) Give unadjusted estimates and, if applicable, confounder-adjusted estimates and their precision (eg, 95% confidence interval). Make clear which confounders were adjusted for and why they were included | <i>Done: pages 9-12, Tables 2 and 3.</i> |
|                          |     | (b) Report category boundaries when continuous variables were categorized                                                                                                                                    | <i>Tables 2 and 3.</i>                   |
|                          |     | (c) If relevant, consider translating estimates of relative risk into absolute risk for a meaningful time period                                                                                             |                                          |
| Other analyses           | 17  | Report other analyses done—eg analyses of subgroups and interactions, and sensitivity analyses                                                                                                               | <i>Done, pages 10-12.</i>                |
| <b>Discussion</b>        |     |                                                                                                                                                                                                              |                                          |
| Key results              | 18  | Summarise key results with reference to study objectives                                                                                                                                                     | <i>Done, pages 12-13.</i>                |
| Limitations              | 19  | Discuss limitations of the study, taking into account sources of potential bias or imprecision. Discuss both direction and magnitude of any potential bias                                                   | <i>Done, pages 14-15.</i>                |
| Interpretation           | 20  | Give a cautious overall interpretation of results considering objectives, limitations, multiplicity of analyses, results from similar studies, and other relevant evidence                                   | <i>Done, pages 15-16.</i>                |
| Generalisability         | 21  | Discuss the generalisability (external validity) of the study results                                                                                                                                        | <i>Done, pages 15-16.</i>                |
| <b>Other information</b> |     |                                                                                                                                                                                                              |                                          |
| Funding                  | 22  | Give the source of funding and the role of the funders for the present study and, if applicable, for the original study on which the present article is based                                                | <i>Done, page 17.</i>                    |

\*Give information separately for cases and controls in case-control studies and, if applicable, for exposed and unexposed groups in cohort and cross-sectional studies.

**Note:** An Explanation and Elaboration article discusses each checklist item and gives methodological background and published examples of transparent reporting. The STROBE checklist is best used in conjunction with this article (freely available on the Web sites of PLoS Medicine at <http://www.plosmedicine.org/>, Annals of Internal Medicine at <http://www.annals.org/>, and Epidemiology at <http://www.epidem.com/>). Information on the STROBE Initiative is available at [www.strobe-statement.org](http://www.strobe-statement.org).

# BMJ Open

## Is increasing urbanicity associated with changes in breastfeeding duration in rural India? An analysis of cross-sectional household data from the Andhra Pradesh Children and Parents Study

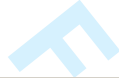

|                                 |                                                                                                                                                                                                                                                                                                                                                                                                                                                                                                                                                                                                                                                                                                                                                                                                                                                                                                                                                                                                                                                                                                                                                                        |
|---------------------------------|------------------------------------------------------------------------------------------------------------------------------------------------------------------------------------------------------------------------------------------------------------------------------------------------------------------------------------------------------------------------------------------------------------------------------------------------------------------------------------------------------------------------------------------------------------------------------------------------------------------------------------------------------------------------------------------------------------------------------------------------------------------------------------------------------------------------------------------------------------------------------------------------------------------------------------------------------------------------------------------------------------------------------------------------------------------------------------------------------------------------------------------------------------------------|
| Journal:                        | <i>BMJ Open</i>                                                                                                                                                                                                                                                                                                                                                                                                                                                                                                                                                                                                                                                                                                                                                                                                                                                                                                                                                                                                                                                                                                                                                        |
| Manuscript ID                   | bmjopen-2017-016331.R1                                                                                                                                                                                                                                                                                                                                                                                                                                                                                                                                                                                                                                                                                                                                                                                                                                                                                                                                                                                                                                                                                                                                                 |
| Article Type:                   | Research                                                                                                                                                                                                                                                                                                                                                                                                                                                                                                                                                                                                                                                                                                                                                                                                                                                                                                                                                                                                                                                                                                                                                               |
| Date Submitted by the Author:   | 08-May-2017                                                                                                                                                                                                                                                                                                                                                                                                                                                                                                                                                                                                                                                                                                                                                                                                                                                                                                                                                                                                                                                                                                                                                            |
| Complete List of Authors:       | Oakley, Laura; London School of Hygiene and Tropical Medicine, Non-communicable Disease Epidemiology<br>Baker, Chris; London School of Hygiene and Tropical Medicine, Non-communicable Disease Epidemiology<br>Addanki, Srivalli; Indian Institute of Public Health<br>Gupta, Vipin; University of Delhi, Department of Anthropology<br>Walia, Gagandeep; Public Health Foundation of India, Centre for Control of Chronic Conditions<br>Aggarwal, Aastha; Public Health Foundation of India, Centre for Control of Chronic Conditions<br>Bhogadi, Santhi; Indian Institute of Public Health<br>Kulkarni, Bharati; National Institute of Nutrition<br>Wilson, Robin; University of Southampton, Geography & Environment<br>Prabhakaran, Dorairaj; Public Health Foundation of India, Centre for Control of Chronic Conditions<br>Ben-Shlomo, Yoav; University of Bristol, School of Social and Community Medicine<br>Davey Smith, George; University of Bristol, School of Social and Community Medicine<br>Radha Krishna, KV; National Institute of Nutrition<br>Kinra, Sanjay; London School of Hygiene and Tropical Medicine, Non-communicable Disease Epidemiology |
| <b>Primary Subject Heading</b>: | Epidemiology                                                                                                                                                                                                                                                                                                                                                                                                                                                                                                                                                                                                                                                                                                                                                                                                                                                                                                                                                                                                                                                                                                                                                           |
| Secondary Subject Heading:      | Global health                                                                                                                                                                                                                                                                                                                                                                                                                                                                                                                                                                                                                                                                                                                                                                                                                                                                                                                                                                                                                                                                                                                                                          |
| Keywords:                       | SOCIAL MEDICINE, NUTRITION & DIETETICS, PUBLIC HEALTH                                                                                                                                                                                                                                                                                                                                                                                                                                                                                                                                                                                                                                                                                                                                                                                                                                                                                                                                                                                                                                                                                                                  |
|                                 |                                                                                                                                                                                                                                                                                                                                                                                                                                                                                                                                                                                                                                                                                                                                                                                                                                                                                                                                                                                                                                                                                                                                                                        |

SCHOLARONE™  
Manuscripts

1  
2  
3 **Is increasing urbanicity associated with changes in breastfeeding duration in rural India? An**  
4 **analysis of cross-sectional household data from the Andhra Pradesh Children and Parents**  
5 **Study**  
6  
7

8  
9 Running title: Urbanicity and breastfeeding in rural India  
10  
11

12  
13  
14 Oakley L<sup>1\*</sup>, Baker C<sup>1</sup>, Addanki S<sup>2</sup>, Gupta V<sup>3</sup>, Walia GK<sup>4</sup>, Aggarwal A<sup>4</sup>, Bhogadi S<sup>2</sup>, Kulkarni B<sup>5</sup>,  
15 Wilson RT<sup>6</sup>, Prabhakaran D<sup>4</sup>, Ben-Shlomo Y<sup>7</sup>, Smith GD<sup>7</sup>, Radha Krishna KV<sup>5</sup>, Kinra S<sup>1</sup>  
16  
17  
18  
19  
20  
21  
22  
23  
24  
25  
26  
27

28 <sup>1</sup>Department of Non-communicable Disease Epidemiology, London School of Hygiene, London,  
29 UK.  
30

31 <sup>2</sup>Indian Institute of Public Health, Hyderabad, India.  
32

33 <sup>3</sup>Department of Anthropology, University of Delhi, India.  
34

35 <sup>4</sup>Centre for Control of Chronic Conditions, Public Health Foundation of India, New Delhi, India  
36

37 <sup>5</sup>National Institute of Nutrition, Hyderabad, India.  
38

39 <sup>6</sup>Geography & Environment, University of Southampton, Southampton, UK.  
40

41 <sup>7</sup>School of Social and Community Medicine, University of Bristol, Bristol, UK.  
42  
43  
44

45 \*Corresponding author

46 Dr Laura Oakley, Assistant Professor, Department of Non-communicable Disease Epidemiology,  
47 London School of Hygiene and Tropical Medicine, Keppel St, London WC1E 7HT  
48 ([laura.oakley@lshtm.ac.uk](mailto:laura.oakley@lshtm.ac.uk))  
49  
50  
51  
52

53 *Main text word count: 3729 words*  
54  
55  
56  
57  
58  
59  
60

## ABSTRACT

**Objective:** To investigate whether village-level urbanicity and lower-level socio-economic factors are associated with breastfeeding practices in transitioning rural communities in India.

**Setting:** 29 villages in Rangareddy district, southern India between 2011-2014.

**Participants:** 7,848 children under 6 years identified via a cross-sectional household survey conducted as part of the Andhra Pradesh Children and Parents Study.

**Outcome measures:** Two key indicators of optimal breastfeeding: termination of exclusive breastfeeding before six months and discontinuation of breastfeeding by 24 months. Village urbanicity was classified as low, medium or high according to satellite assessed night-light intensity.

**Results:** Breastfeeding initiation was almost universal, and approximately two in three children were exclusively breastfed to six months and a similar proportion breastfed to 24 months. Using multilevel logistic regression, increasing urbanicity was associated with breastfeeding discontinuation before 24 months (medium urbanicity OR 1.45, 95% CI 0.71-2.96; high urbanicity OR 2.96, 95% CI 1.45-6.05) but not with early (<6 months) termination of exclusive breastfeeding. Increased maternal education was independently associated with both measures of suboptimal breastfeeding, and higher household socio-economic position was associated with early termination of exclusive breastfeeding.

**Conclusion:** In this transitional Indian rural community, early stage urbanicity was associated with a shorter duration of breastfeeding. Closer surveillance of changes in breastfeeding practices alongside appropriate intervention strategies are recommended for emerging economies.



**ARTICLE SUMMARY**

- Previous studies have investigated the association between urbanisation and breastfeeding using the urban-rural dichotomy.
- We used data from a large rural cohort in southern India that is currently undergoing rapid and uneven urbanisation due to its proximity to a major urban centre.
- The use of night-time light intensity data as an indicator of urbanicity allowed us to examine subtler changes in breastfeeding practices along the urban-rural continuum.
- Sixteen percent of children were excluded from the analysis due to missing information on breastfeeding practices.
- We relied on maternal retrospective recall of breastfeeding events for our outcome measurement.

## INTRODUCTION

The promotion of breastfeeding is one of the three interventions identified as having the largest potential impact on global child death<sup>1</sup>. Optimal breastfeeding is defined by the World Health Organisation (WHO) as early breastfeeding initiation, exclusive breastfeeding to six months, and continued breastfeeding to two years or beyond alongside appropriate complementary feeding. Many low and middle income countries (LMICs) have a strong tradition of near universal and prolonged breastfeeding<sup>2,3</sup>, though exclusive breastfeeding to six months (hereafter referred to simply as ‘exclusive breastfeeding’) is less common. A small increase in the global proportion of children exclusively breastfed between 1995 and 2010 has been reported, but the overall proportion (40%) still falls strikingly short of universal coverage and obscures differences in country-specific trends<sup>4</sup>.

Many LMICs are currently experiencing a rapid increase in the proportion of people living in built-up areas, and the social, cultural and economic changes associated with this process of urbanisation have the potential to impact on traditional breastfeeding practices. Direct threats to optimal breastfeeding include early introduction of other liquids, and inappropriate supplementation with solid or semi-solid foods. These behaviours may be influenced by changing social norms, for example increasing numbers of mothers working outside the home. Of all positive health behaviours, breastfeeding is one of the few more prevalent in LMICs compared to HICs<sup>3</sup>. Within LMICs this trend is mirrored by a higher prevalence of suboptimal breastfeeding in urban areas compared to rural areas<sup>5</sup>: a trend also observed in India<sup>6-8</sup> alongside variation by various socio-economic indicators<sup>6-10</sup>. Although the high level urban-rural comparison is of interest, there may also be subtler changes in breastfeeding practices along the urban-rural continuum given the peri-urban effects on villages close to urban centres. These changes can potentially be investigated by using a measure of ‘urbanicity’ which aims to assess the extent of urbanisation in a given area. A number of different indicators of urbanicity have evolved, including the use of remote light sensing<sup>11,12</sup>, and multi-component scales<sup>13,14</sup>. The early identification of changes in breastfeeding practices

1  
2  
3 accompanying the urbanicity transition - and an understanding of the underlying mechanisms - are  
4  
5 necessary for informing appropriate interventions to protect traditionally positive breastfeeding  
6  
7 practices in transitioning communities.  
8  
9

10 The Andhra Pradesh Children and Parents Study (APCAPS) is a rural socio-demographic cohort in  
11  
12 southern India that is currently undergoing rapid and uneven urbanisation due to its proximity to a  
13  
14 major urban centre (Hyderabad), providing a unique opportunity to examine the association between  
15  
16 early stage urbanicity and breastfeeding practices.  
17  
18  
19  
20

## 21 22 **METHODS**

### 23 24 **Study design**

25  
26 APCAPS is an intergenerational cohort originally established to study the long-term effects of early-  
27  
28 life undernutrition on risk of cardiovascular disease and subsequently expanded to include trans-  
29  
30 generational influences of other environmental and genetic factors on chronic diseases in  
31  
32 transitioning rural India.  
33  
34  
35

36  
37 The original cohort is based on the participants in the Hyderabad Nutrition Trial (HNT) conducted in  
38  
39 1987–90 in 29 villages approximately 50-100km from Hyderabad in Telangana state (formally  
40  
41 Andhra Pradesh), southern India<sup>15</sup>. The dataset used in this analysis is based on a cross-sectional  
42  
43 household survey conducted between 2011 and 2014 in the study villages. All households  
44  
45 (household defined as a group of people living in the same residence and sharing a common kitchen)  
46  
47 in the study villages were visited by fieldworkers and socio-demographic information was collected  
48  
49 on each household. In addition, a basic health profile was collected for each child under 6 years of  
50  
51 age, comprising information on infant feeding (colostrum intake, total duration of breastfeeding, age  
52  
53 of onset of weaning), immunization and anthropometric measurements. Fieldworkers made repeated  
54  
55 visits to households to maximise response and to clarify inconsistencies in collected data. Data were  
56  
57  
58  
59  
60

1  
2  
3 collected from 23,314 households in total, of which 5,968 (25.6%) included at least one child under 6  
4  
5 years.  
6

7  
8 The study received approval from the ethics committees of the National Institute of Nutrition (NIN)  
9  
10 (Hyderabad, India) and London School of Hygiene and Tropical Medicine (London, UK). Approval  
11  
12 was also sought from the Indian Council for Medical Research and the village heads and their  
13  
14 committees in each of the study villages. Written informed consent (or witnessed thumbprint if  
15  
16 illiterate) was obtained from the participants prior to their inclusion in the study.  
17  
18

### 19 20 21 **Breastfeeding outcomes and explanatory variables** 22

23  
24 Two breastfeeding outcomes were used in this analysis: termination of exclusive breastfeeding  
25  
26 (EBF) before six months, and discontinuation of breastfeeding before 24 months. These outcomes  
27  
28 reflect failure to achieve two of the specific WHO recommendations for optimum feeding practices  
29  
30 (exclusive breastfeeding to six months and continued breastfeeding to two years)<sup>16</sup>. As part of the  
31  
32 basic health profile for children compiled for children under 6 in the household survey, mothers were  
33  
34 asked to report the total duration of breastfeeding (in months), and the age (in months) at onset of  
35  
36 weaning. ‘Weaning’ was defined by fieldworkers as the age at which the child was given anything  
37  
38 other than mother’s milk, i.e. age at initiation of complementary feeding. A copy of the questions  
39  
40 used in the survey is provided as a supplementary figure (figure S1).  
41  
42  
43

44  
45 Our primary explanatory factor was urbanicity, measured using remotely-sensed village-level night-  
46  
47 time light intensity (NTLI) scores, as these are objective, unbiased and easily available over wide  
48  
49 areas. Although this analysis represents the first application of NTLI data to the APCAPS  
50  
51 population, NTLI data is increasingly being used as an area-based indicator of socio-economic  
52  
53 development<sup>11,12</sup>. The light which is included in the NTLI score include any outside lights, ranging  
54  
55 from fires and gas flares to lights related to human settlements. Low level lights such as from streets  
56  
57  
58  
59  
60

1  
2  
3 and car headlights can be observed if there is a sufficient number of sources, but indoor lights cannot  
4  
5 be observed. NTLI scores were calculated for 2012 using the National Oceanic and Atmospheric  
6  
7 Administration (NOAA) Stable Lights product which provides yearly average night-time light  
8  
9 intensity measures processed and filtered to remove events such as fires and lightening  
10  
11 contamination by cloud or moon reflections and background noise, at a 1km resolution. Scores for  
12  
13 each village were calculated by summing the raw NTLI values over each village polygon (digitised  
14  
15 using Bing Maps combined with GPS-based surveying by the field teams). The 1km-resolution NTLI  
16  
17 data was upscaled to 100m resolution to allow more accurate estimation of the NTLI values covered  
18  
19 by each polygon, as many villages are small and partially cover multiple 1km grid cells.  
20  
21

22  
23 NTLI scores for each village were validated against alternative urbanicity measurements (field  
24  
25 worker ranking and a multi-component urbanicity score based on household-level material assets and  
26  
27 village-level availability of infrastructure and services) showing positive correlations (0.65 and 0.53  
28  
29 respectively) . Study villages were ranked by their NTLI score and divided into tertiles to represent  
30  
31 'low' (10 villages), 'medium' (10 villages) and 'high' (9 villages) levels of urbanicity. The NTLI tertile  
32  
33 scores matched the field worker ranking in 50% of the villages, and cases of disagreement between  
34  
35 NTLI and field worker ranking, the latter was more conservative and ranked villages as medium  
36  
37 urbanicity rather than high urbanicity. Only one village had a significant divergence between NTLI  
38  
39 and fieldworker ranking.  
40  
41  
42

43  
44 In addition, we investigated mother-level socio-economic factors which may be correlated with  
45  
46 urbanicity: maternal education (no formal education, primary education, or secondary education and  
47  
48 higher), maternal employment (paid work vs. no paid work), and a household level standard of living  
49  
50 index (SLI). Asset-based SLIs have been established as a valid proxy measure of household wealth<sup>17</sup>.  
51

52  
53 We generated a SLI score for each household, calculated by using information on household assets  
54  
55 including house and land ownership, characteristics of the home (electricity, water pump, separate  
56  
57 kitchen, separate toilet) and ownership of various assets (tractor, radio, AC, washing machine, bore  
58  
59  
60

1  
2  
3 hole, telephone, TV, fridge, bicycle, two wheeler, four wheeler, bank account, animal cart, sofa,  
4  
5 cot/bed, mattress, table). Principal component analysis (PCA) was used to determine the weights for  
6  
7 each component in the index<sup>18</sup>, and households were divided into quintiles according to their  
8  
9 weighted score. We also report data on a number of other factors likely to be associated with  
10  
11 breastfeeding practices: sex of child, birth order, maternal age (grouped), and household composition  
12  
13 (joint/extended or nuclear).  
14  
15  
16  
17  
18  
19

### 20 **Statistical analysis**

21  
22 We included in the analysis all children under 6 years who were breastfed at least once and for whom  
23  
24 information was available on feeding history. The analysis investigating termination of EBF before  
25  
26 six months was restricted to children six months or older at the time of survey, and correspondingly  
27  
28 only those children aged 24 months or older were included in the analysis of discontinuation of  
29  
30 breastfeeding before 24 months. A small proportion of children (3%) had missing information on one  
31  
32 or more variables of interest and were excluded.  
33  
34  
35

36 We hypothesised that urbanicity would be associated with less favourable breastfeeding practices.  
37  
38 This could operate through at least two different indirect pathways (see figure 1): through increasing  
39  
40 individual-level employment, education or assets so that households are less likely to maintain  
41  
42 breastfeeding, or due to more urbanised villages have a different 'collective' attitude to  
43  
44 breastfeeding. We investigated these hypotheses by using multilevel logistic regression modelling  
45  
46 with children (level 1) nested within mothers (level 2, max n=5,477) nested within villages (level 3,  
47  
48 n=29). This approach allowed us to model the variation in breastfeeding outcomes at each level  
49  
50 (random effects), and to estimate the effect of specific mother and village-level factors on  
51  
52 breastfeeding practices (fixed effects). We initially fitted a null model (model 1) for each of the two  
53  
54 outcomes with random intercepts only in order to estimate the baseline between-mother and  
55  
56  
57  
58  
59  
60

1  
2  
3 between-village variance. We then fitted a series of models for each breastfeeding outcome, adding  
4  
5 covariates as fixed effects to the included random effects, where fixed effects were interpreted as the  
6  
7 average effect on the specified breastfeeding outcome across all mothers and villages. These models  
8  
9 included individual demographic factors and mother-level socioeconomic indicators (model 2),  
10  
11 individual demographic factors and village-level urbanicity (model 3), and all variables (model 4).  
12  
13 Due to the correlation between socio-economic indicators and urbanicity, we considered estimates  
14  
15 from model 3 our main results. Proportional change in variance (PCV) was calculated as a measure  
16  
17 of change in mother-level (level 2) and village-level (level 3) variance between the null model and  
18  
19 subsequent models, and (for village-level variance only) the measure of change between a model  
20  
21 with (model 4) and without (model 2) the village-level urbanicity variable included.  
22  
23

24  
25 Estimates of the association between mother-level socio-economic variables and breastfeeding  
26  
27 outcomes were derived from model 2 (adjusted for individual-level demographic variables, but not  
28  
29 urbanicity).  
30  
31

32  
33 We hypothesised *a priori* that the association between village-level urbanicity and breastfeeding may  
34  
35 vary by household SLI and maternal education. We investigated these cross-level interactions in  
36  
37 further models (for SLI, comparing the richest two quintiles to the three poorest quintiles; for  
38  
39 education, comparing secondary education versus no or primary education).  
40  
41

42 All statistical analyses were conducted using Stata 14 (StataCorp, College Station, Texas, USA).  
43  
44  
45

## 46 47 **RESULTS**

### 48 49 **Characteristics of the sample**

50  
51 Information on breastfeeding was available on a total of 7,848 children (5,390 households), 99%  
52  
53 (n=7,839) of whom were breastfed at least once (figure 2).  
54  
55  
56  
57  
58  
59  
60

1  
2  
3 The characteristics of ever breastfed children by urbanicity of village are presented in table 1. There  
4  
5 was little variation in infant sex, birth order or maternal age by urbanicity of village. Children  
6  
7 residing in villages classified as more urbanised had mothers that were more likely to have been  
8  
9 educated to secondary level, less likely to have mothers in paid employment, and a higher standard  
10  
11 of living. Joint/extended families were slightly less prevalent in high urbanicity villages.  
12  
13

### 14 15 16 17 **Termination of EBF by six months**

18  
19 Among the 7,142 children no longer exclusively breastfed (88 children  $\geq 6$  months were still  
20  
21 exclusively breastfed at the time of survey), the mean age at termination of EBF was 6.1 months (sd  
22  
23 1.8), median 6.0 months, and intra-quartile (IQ) range 5-6 months. One third of children (33.5%,  
24  
25 n=2,420) were EBF for a period of less than six months (table 1).  
26  
27

#### 28 29 *Fixed effects*

30  
31 There was no statistically significant trend regarding early termination of EBF and village level  
32  
33 urbanicity. The prevalence of early termination of EBF was lowest in medium urbanicity villages  
34  
35 (27.2%), higher in lower urbanicity villages (33.6%), and highest in high urbanicity villages (36.5%).  
36  
37 In multivariable analysis there was no evidence that urbanicity was associated with termination of  
38  
39 EBF by six months (model 3, table 2), with little change in estimates after the addition of  
40  
41 demographic and socio-economic covariates to the model.  
42  
43  
44

45  
46 After adjustment for other individual- and mother-level covariates, both children of mothers with  
47  
48 primary education and children of mothers with secondary education were more likely to be EBF for  
49  
50 less than six months when compared to children of mothers with no formal education (primary  
51  
52 education OR 3.37, 95% CI 2.13-5.31; secondary education OR 1.69, 95% CI 1.12-2.54; model 2,  
53  
54 table 2). Increasing SLI quintile was associated with up to twice the odds of early termination of EBF  
55  
56 compared to children from the poorest households (richest quintile OR 2.11, 95% CI 1.22-3.63; p  
57  
58  
59  
60



1  
2  
3 value for trend = 0.003). There was some evidence that maternal employment was also associated  
4  
5 with early termination of EBF (OR 1.43, 95% CI 1.00-2.03). The estimates for socio-economic  
6  
7 variables did not change with the addition of urbanicity to the model.  
8  
9

#### 10 *Interaction effects*

11  
12 There was no evidence of interaction between urbanicity and either household SLI or maternal  
13  
14 education.  
15  
16

#### 17 *Random effects*

18  
19  
20 There was statistically significant unexplained variance estimates at both the mother and village level  
21  
22 (model 1, table 1). Unexplained variability was consistently higher at the mother level compared to  
23  
24 the village level. The addition of individual level parameters resulted in a slight decline in  
25  
26 community-level variation (variance 1.50 and 1.44 in models 1 and 2 respectively). There was a  
27  
28 further decline in village-level variance when the urbanicity variable was added to the model  
29  
30 (variance 1.32 in model 4). Comparing the village-level variance between model 2 and model 4  
31  
32 suggests that 8.5% of the observed village-level variation can be explained by urbanicity.  
33  
34  
35  
36  
37  
38

#### 39 **Discontinuation of breastfeeding by 24 months**

40  
41  
42 At the time of survey, 784 children aged  $\geq 24$  months were still being breastfed. Among those  
43  
44 children no longer breastfed, the mean and median age at discontinuation of breastfeeding was 21.4  
45  
46 (sd 8.5) and 24 months respectively, and the IQR was 15-24 months. Nearly four in ten children  
47  
48 (37.8%, n=2037) were breastfed for less than 24 months in total.  
49  
50

#### 51 *Fixed effects*

52  
53  
54 Discontinuation of breastfeeding by 24 months was more common in high urbanicity villages  
55  
56 (42.1%) and least common in low urbanicity villages (29.6%). After adjustment for individual-level  
57  
58  
59  
60

1  
2  
3 demographic factors, high urbanicity was associated with increased odds of breastfeeding  
4 discontinuation before 24 months (OR 2.64, 95% CI 1.29, 5.42; model 3, table 3). The OR for  
5 medium urbanicity was slightly increased, though not statistically significant at  $p < 0.05$  (OR 1.45,  
6 95% CI 0.71, 2.96; model 4) and there was evidence of a linear trend ( $p$  value 0.008). Additional  
7 adjustment for socio-economic variables resulted in a slight reduction in the odds ratios (high  
8 urbanicity OR 2.64, 95% CI 1.29, 5.42; medium urbanicity OR 1.35, 95% CI 0.66, 2.79; model 4).

9  
10  
11  
12  
13  
14  
15  
16  
17 When compared to children of mothers with no formal schooling, children of mothers with  
18 secondary education were at significantly higher odds of breastfeeding discontinuation after  
19 adjustment for all demographic and socio-economic factors (OR 1.63, 95% CI 1.23-2.16; model 2,  
20 table 3). Maternal employment was associated with a slight reduction in the odds of breastfeeding  
21 discontinuation before 24 months (OR 0.77, 95% CI 0.60-0.99). There was no evidence that SLI  
22 quintile was independently associated with breastfeeding discontinuation by 24 months. The  
23 inclusion of urbanicity in the model did not alter the socio-economic estimates of effect.

### 32 *Interaction effects*

33  
34  
35  
36  
37  
38  
39  
40  
41  
42  
43  
44  
45  
46  
47  
48  
49  
50  
51  
52  
53  
54  
55  
56  
57  
58  
59  
60  
There was no evidence of interaction between urbanicity and mother-level socio-economic factors (household SLI and maternal education).

### 40 *Random effects*

41  
42  
43  
44  
45  
46  
47  
48  
49  
50  
51  
52  
53  
54  
55  
56  
57  
58  
59  
60  
The random effects parameters for models investigating discontinuation of breastfeeding before 24 months are presented in table 3. In the null model (model 1) the proportion of residual variance attributable to mothers (level 2, 53.7%) was much higher than the variance attributable to villages (level 3, 8.5%). The addition of urbanicity to a model including individual and mother-level factors resulted in a decrease of 8.5% in village-level variance.

## DISCUSSION

### Summary of main findings

In this study approximately two in three children were exclusively breastfed to six months and a similar proportion breastfed to 24 months. At the village level, high urbanicity was associated with breastfeeding discontinuation before 24 months, but there was no evidence that urbanicity was associated with early termination of EBF. At the mother level, increased maternal education was independently associated with both indicators of suboptimal breastfeeding, and high SLI associated with an increased odds of EBF for less than 6 months. Maternal employment showed a variable association with breastfeeding. The residual variation in breastfeeding outcomes suggested greater heterogeneity within-villages than between-villages.

### Consistency with previous studies

Our estimates of breastfeeding prevalence are largely consistent with those derived from other population-based studies in India. Early results from NFHS-4 (2015-16) Telangana state indicate that 67.3% of infants aged 0-6 months (at the time of survey) were exclusively breastfed<sup>19</sup>, and a study of 600 mother-child pairs in Andhra Pradesh reports that 75% of infants aged 3-5 months were exclusively breastfed<sup>20</sup>. Some of the younger infants included in these two study samples will have ceased breastfeeding by six months, suggesting that our study sample has a slightly higher proportion of exclusive breastfeeding to six months. The overall proportion of children breastfed until at least 24 months in our study was almost identical to an analysis of all-India NFHS-2 data: (62.2% vs. 63%)<sup>6</sup>.

Very few existing studies have investigated the association between urbanicity and breastfeeding. In one study based in the Philippines, Dahly et al. reported that length of breastfeeding was negatively correlated with increasing urbanicity (using a multicomponent measure)<sup>13</sup>. The persisting association between high urbanicity and increased odds of breastfeeding discontinuation < 24 months - after

1  
2  
3 adjustment for lower level socio-economic circumstances - reported in our study support the findings  
4  
5 from Dahly et al.  
6

7  
8 Increasing urbanicity is associated with positive socio-economic changes such as improved  
9  
10 education for women and increased income and household wealth. A number of other studies from  
11  
12 India and other LMICs have demonstrated a negative association between improved socio-economic  
13  
14 position and breastfeeding practices<sup>6-8,21-24</sup>. We found similar results with regard to household SLI  
15  
16 and increased maternal education, and early termination of exclusive breastfeeding. One explanation  
17  
18 for this trend could be the greater affordability and/or social desirability of commercial breast milk  
19  
20 substitutes. The association between education and early termination of exclusive breastfeeding was  
21  
22 strongest for primary education (primary education OR 3.37, 95% CI 2.13-5.31; secondary education  
23  
24 OR 1.69, 95% CI 1.12-2.54). This suggests that while education in general is associated with a  
25  
26 reduction in the length of exclusive breastfeeding, higher levels of education partially ameliorate this  
27  
28 effect. Interestingly, there was some evidence that maternal employment had a protective effect on  
29  
30 breastfeeding discontinuation by 24 months, though the opposite trend was observed with regard to  
31  
32 early cessation of EBF. There is some evidence of a U-shaped association between education and  
33  
34 women's employment in India, with paid employment outside the home common among women  
35  
36 with little or no formal education, lower among women with moderate levels of education, and rising  
37  
38 again with high levels of education<sup>25</sup>. Mothers in employment are likely to be a heterogeneous group,  
39  
40 making it difficult to draw any firm conclusions about the association between paid employment and  
41  
42 breastfeeding practices in this sample.  
43  
44  
45  
46  
47  
48  
49  
50

### 51 **Strengths and limitations**

52  
53 The APCAPS cohort provides a unique opportunity to investigate current health behaviour and  
54  
55 outcomes set against the backdrop of rapid urbanisation and economic transition in rural India. While  
56  
57  
58  
59  
60

1  
2  
3 studies based on the high level urban-rural comparison may help to predict the impact of 'total'  
4  
5 urbanisation on breastfeeding practices, they obscure the temporal emergence of subtler changes in  
6  
7 the urban environment which may be amenable to intervention. The use of multilevel models  
8  
9 enabled us to explore the role of factors at different levels: individual, mother, and village.  
10

11  
12 Although the vast majority of all under 6s in the study villages were included in our analysis, 15.7%  
13  
14 (n=1,464) were excluded due to missing information on feeding history due to the mother living  
15  
16 elsewhere, travelling, or deceased. In a comparison of included and excluded children there was no  
17  
18 evidence that infant sex, infant age, number of under 6s living in the household, or household SLI  
19  
20 differed by missing status (supplementary table 1). A slightly higher proportion of excluded children  
21  
22 resided in high urbanicity villages (p 0.09).  
23  
24

25  
26 We relied on maternal recall of breastfeeding events for our outcome measurement. For the analysis  
27  
28 of exclusive breastfeeding at six months, the recall period ranged from 0 to 5.5 years, and for  
29  
30 breastfeeding continuation at 24 months the recall period was 0 to 4 years. A review of 11 studies  
31  
32 assessing the validity and reliability of maternal recall of breastfeeding concluded that maternal  
33  
34 recall of breastfeeding duration is good, especially when the recall period is short (<3 years)<sup>26</sup>. A  
35  
36 more recent study, conducted in a population where breastfeeding initiation was near universal and  
37  
38 duration long, found that even after twenty years, 64% of women recalled duration correctly to  
39  
40 within one month (90% within three months)<sup>27</sup>. However, there is some evidence that recall of age at  
41  
42 introduction of complementary foods or non-breastmilk fluids is less accurate<sup>26</sup>. It is unclear whether  
43  
44 any misclassification of breastfeeding behaviour is independent of other characteristics, but where  
45  
46 differential misclassification has been suggested, more highly educated or wealthier mothers have  
47  
48 tended to over-report breastfeeding<sup>28</sup>. Given that these characteristics were associated with  
49  
50 suboptimal breastfeeding practices in this study, we may have underestimated any true difference in  
51  
52 breastfeeding by socio-demographic characteristics.  
53  
54  
55  
56  
57  
58  
59  
60

1  
2  
3 Our measure of urbanicity was derived from night-time light intensity data, information which is  
4 objective, regularly updated and free to use. Additionally, data on night-time light intensity is  
5 available over a number of years and could be used in future studies to investigate trends in  
6 urbanicity over time. However, it must be noted that urbanicity is an ecological indicator and as such  
7 may not accurately reflect individual environment, particularly given that many women may travel  
8 regularly outside their home village for work or family reasons.  
9  
10  
11  
12  
13  
14  
15  
16  
17  
18  
19

### 20 **Implications**

21  
22 Nearly a quarter (24%) of all global under-five deaths occur in India<sup>29</sup>. In light of the failure to  
23 achieve the Millennium Development Goal infant mortality rate (IMR) target reduction<sup>30</sup>, a new  
24 target of reducing the IMR to 20 per 1,000 live births by 2020 has recently been proposed<sup>31</sup>. Early  
25 results from the latest National Family Health Survey (NFHS-4) data collected in Telegana state  
26 report a current IMR of 28 (20 in urban areas, 35 in rural areas)<sup>19</sup>. An increase in optimal  
27 breastfeeding practices will help to achieve improvements in infant survival, in addition to reducing  
28 the considerable burden of infant morbidity<sup>3,32</sup>. India faces an ever-increasing epidemic of chronic  
29 disease in common with many other LMICs. Several studies have suggested that breastfeeding has a  
30 protective effect on long-term outcomes such as obesity and diabetes in adulthood<sup>33</sup>, though residual  
31 confounding is difficult to exclude<sup>34</sup>, and the most recent data from the PROBIT RCT do not support  
32 an association between breastfeeding and adiposity in late childhood<sup>35</sup>.  
33  
34  
35  
36  
37  
38  
39  
40  
41  
42  
43  
44  
45  
46

47 A substantial proportion of infants in India are exclusively breastfed for less than the six months  
48 recommended by WHO<sup>7,9,10</sup>, and a recent study reported that there was little change in the prevalence  
49 of exclusive breastfeeding in India between 1992-1993 and 2005-2006<sup>8</sup>. The lack of country-specific  
50 holistic and coordinated policy programmes supporting breastfeeding has also been highlighted<sup>36</sup>.  
51  
52  
53  
54  
55  
56  
57  
58  
59  
60

1  
2  
3 Therefore, research to further understand the determinants of suboptimal breastfeeding practices in  
4  
5 India is timely.  
6  
7  
8  
9

10 Our findings suggest that in LMICs with a strong tradition of breastfeeding, negative changes in  
11  
12 breastfeeding behaviour may be observed during early stages of the urbanicity transition. Reduced  
13  
14 duration of breastfeeding among more educated mothers may be one of the earliest markers of this  
15  
16 change. India is currently undergoing rapid urbanisation, with the proportion of the population living  
17  
18 in towns and cities is set to increase from an estimated 28% in 2011 to 38% by 2026<sup>37</sup>. Many more  
19  
20 individuals live in areas which though traditionally described as rural are increasingly displaying  
21  
22 many of the characteristics of urban areas. There is good evidence that breastfeeding behaviours are  
23  
24 amenable to change through interventions delivered at the household and community level, as well  
25  
26 as those targeting health systems<sup>38,39</sup>. Intervention programmes to protect and promote breastfeeding  
27  
28 should be considered in transitioning communities to counteract changes in breastfeeding practices,  
29  
30 preferably targeted at those mothers identified as most at risk of suboptimal breastfeeding practices.  
31  
32  
33  
34  
35  
36  
37  
38  
39  
40  
41  
42  
43  
44  
45  
46  
47  
48  
49  
50  
51  
52  
53  
54  
55  
56  
57  
58  
59  
60

### Acknowledgements

We wish to acknowledge our dedicated field teams led by Santhi Bhogadi and the study participants who made this study possible. We also acknowledge the contribution of Naveen Chittaluri and Ekta Jain to data processing and management. We also thank Cono Ariti at the London School of Hygiene and Tropical Medicine (LSHTM) who provided statistical advice, and Poppy Mallinson (LSHTM) for assistance with calculating the standard of living index.

### Competing Interests

None declared.

### Source of funding

The APCAPS household survey was funded by a Wellcome Trust Strategic Award (Grant: 084674/Z, Principal Investigator Shah Ebrahim).

### Contributorship statement

The study was conceived and designed by Shah Ebrahim and VG, and overall study management was by VG, GKW, KVRK and SK. Study tools were developed by VG, GKW, and AA, and the study implemented by VG and GKW. Data management was provided by AA, GKW, SB and CB. SB was in charge of field management, SA and CB contributed to data collection and processing. RW obtained and processed the NTLI data. LO, CB, SA and SK designed the analysis reported here. LO performed the statistical analysis, SK helped interpret the results and provided crucial input on manuscript preparation. LO, CB and SK were responsible for the initial draft of the manuscript. All authors contributed to the revision of the manuscript and reviewed and approved the final version.

### Data sharing

For details on how to access APCAPS data, please visit <http://apcaps.lshtm.ac.uk>



## References

1. Bhutta ZA, Das JK, Rizvi A, et al. Evidence-based interventions for improvement of maternal and child nutrition: what can be done and at what cost? *The Lancet* 2013;**382**(9890):452-77 doi: [http://dx.doi.org/10.1016/S0140-6736\(13\)60996-4](http://dx.doi.org/10.1016/S0140-6736(13)60996-4)[published Online First: Epub Date]].
2. Haggerty PA, Rutstein SO. Breastfeeding and complementary infant feeding/postpartum effects (DHS Comparative Studies No. 30). Calverton, Maryland, USA, 1999.
3. Victora CG, Bahl R, Barros AJD, et al. Breastfeeding in the 21st century: epidemiology, mechanisms, and lifelong effect. *The Lancet* 2016;**387**(10017):475-90 doi: 10.1016/S0140-6736(15)01024-7[published Online First: Epub Date]].
4. Cai X, Wardlaw T, Brown DW. Global trends in exclusive breastfeeding. *International Breastfeeding Journal* 2012;**7**(1):1-5 doi: 10.1186/1746-4358-7-12[published Online First: Epub Date]].
5. Smith LC, Ruel MT, Ndiaye A. Why Is Child Malnutrition Lower in Urban Than in Rural Areas? Evidence from 36 Developing Countries. *World Development* 2005;**33**(8):1285-305 doi: <http://dx.doi.org/10.1016/j.worlddev.2005.03.002>[published Online First: Epub Date]].
6. Malhotra R, Noheria A, Amir O, et al. Determinants of termination of breastfeeding within the first 2 years of life in India: evidence from the National Family Health Survey-2. *Maternal and Child Nutrition* 2008;**4**(3):181-93
7. Patel A, Badhoniya N, Khadse S, et al. Infant and young child feeding indicators and determinants of poor feeding practices in India: secondary data analysis of National Family Health Survey 2005-06. *Food & Nutrition Bulletin* 2010;**31**(2):314-33
8. Chandhiok N, Singh KJ, Sahu D, et al. Changes in exclusive breastfeeding practices and its determinants in India, 1992–2006: analysis of national survey data. *International Breastfeeding Journal* 2015;**10**(1):1-13 doi: 10.1186/s13006-015-0059-0[published Online First: Epub Date]].
9. Meshram II, Laxmaiah A, Venkaiah K, et al. Impact of feeding and breastfeeding practices on the nutritional status of infants in a district of Andhra Pradesh, India. *National Medical Journal of India* 2012;**25**(4):201-06
10. Srivastava NM, Awasthi S. Breastfeeding practices for newborns among urban poor in Lucknow, northern India: A prospective follow-up study. *Clinical Epidemiology and Global Health* 2014;**2**(2)
11. Noor AM, Alegana VA, Gething PW, et al. Using remotely sensed night-time light as a proxy for poverty in Africa. *Population Health Metrics* 2008;**6**(1):1-13 doi: 10.1186/1478-7954-6-5[published Online First: Epub Date]].
12. Tatem AJ, Hay SI. Measuring urbanization pattern and extent for malaria research: a review of remote sensing approaches. *J Urban Health* 2004;**81**(3):363-76
13. Dahly DL, Adair LS. Quantifying the urban environment: A scale measure of urbanicity outperforms the urban–rural dichotomy. *Social Science & Medicine* 2007;**64**(7):1407-19 doi: <http://dx.doi.org/10.1016/j.socscimed.2006.11.019>[published Online First: Epub Date]].
14. Cyril S, Oldroyd J, Renzaho A. Urbanisation, urbanicity, and health: a systematic review of the reliability and validity of urbanicity scales. *BMC Public Health* 2013;**13**(1):513
15. Kinra S, Radha Krishna K, Kuper H, et al. Cohort Profile: Andhra Pradesh Children and Parents Study (APCAPS). *International Journal of Epidemiology* 2013;**43**(5):1417-24 doi: 10.1093/ije/dyt128[published Online First: Epub Date]].
16. World Health Organization. Infant and young child nutrition: Global Strategy for Infant and Young Child Feeding. Geneva: World Health Organization, 2003.
17. Filmer D, Pritchett L. Estimating Wealth Effects Without Expenditure Data—Or Tears: An Application To Educational Enrollments In States Of India. *Demography* 2001;**38**(1):115-32 doi: 10.1353/dem.2001.0003[published Online First: Epub Date]].
18. Vyas S, Kumaranayake L. Constructing socio-economic status indices: how to use principal components analysis. *Health Policy and Planning* 2006;**21**(6):459-68 doi: 10.1093/heapol/czl029[published Online First: Epub Date]].

19. International Institute for Population Sciences, Mumbai. National Family Health Survey-4 (2015-16): Telegana State Factsheet. Secondary National Family Health Survey-4 (2015-16): Telegana State Factsheet 2016. [http://rchiips.org/nfhs/pdf/NFHS4/TG\\_FactSheet.pdf](http://rchiips.org/nfhs/pdf/NFHS4/TG_FactSheet.pdf).
20. Shroff MR, Griffiths PL, Suchindran C, et al. Does maternal autonomy influence feeding practices and infant growth in rural India? *Social science & medicine* (1982) 2011;**73**(3):447-55 doi: 10.1016/j.socscimed.2011.05.040[published Online First: Epub Date]].
21. Nath DC, Goswami G. Determinants of breast-feeding patterns in an urban society of India. *Human Biology* 1997;**69**(4):557-73
22. Senarath U, Agho KE, Akram DE, et al. Comparisons of complementary feeding indicators and associated factors in children aged 6-23 months across five South Asian countries. *Maternal & Child Nutrition* 2012;**8** (Suppl 1):89-106
23. Senarath U, Dibley MJ, Agho KE. Factors Associated With Nonexclusive Breastfeeding in Five East and Southeast Asian Countries: A Multilevel Analysis. *Journal of Human Lactation* 2010;**26**(3) doi: 10.1177/0890334409357562[published Online First: Epub Date]].
24. Grummer-Strawn LM. The Effect of Changes in Population Characteristics on Breastfeeding Trends in Fifteen Developing Countries. *International Journal of Epidemiology* 1996;**25**(1):94-102 doi: 10.1093/ije/25.1.94[published Online First: Epub Date]].
25. Kapsos S, Silberman A, Bourmpoula E. Why is female labour force participation declining so sharply in India? (ILO Research Paper No.10): International Labour Office, 2014.
26. Li R, Scanlon KS, Serdula MK. The Validity and Reliability of Maternal Recall of Breastfeeding Practice. *Nutrition Reviews* 2005;**63**(4):103-10 doi: 10.1111/j.1753-4887.2005.tb00128.x[published Online First: Epub Date]].
27. Natland ST, Andersen LF, Nilsen TIL, et al. Maternal recall of breastfeeding duration twenty years after delivery. *BMC Medical Research Methodology* 2012;**12**(1):179 doi: 10.1186/1471-2288-12-179[published Online First: Epub Date]].
28. Huttly SRA, Barros FC, Victora CG, et al. DO MOTHERS OVERESTIMATE BREAST FEEDING DURATION? AN EXAMPLE OF RECALL BIAS FROM A STUDY IN SOUTHERN BRAZIL. *American Journal of Epidemiology* 1990;**132**(3):572-75 doi: 10.1093/oxfordjournals.aje.a115693[published Online First: Epub Date]].
29. United Nations Inter-agency Group for Child Mortality Estimation. Levels & Trends in Child Mortality: Report 2012. New York: United Nations Children's Fund, 2012.
30. You D, Hug L, Ejdemyr S, et al. Global, regional, and national levels and trends in under-5 mortality between 1990 and 2015, with scenario-based projections to 2030: a systematic analysis by the UN Inter-agency Group for Child Mortality Estimation. *The Lancet* 2015;**386**(10010):2275-86 doi: [http://dx.doi.org/10.1016/S0140-6736\(15\)00120-8](http://dx.doi.org/10.1016/S0140-6736(15)00120-8)[published Online First: Epub Date]].
31. Sachidananda Kamath S. Reducing the Infant Mortality Rate of India to 20 by 2020: Together we can do. *Indian Pediatrics* 2015;**52**(194)
32. Neovita Study Group. Timing of initiation, patterns of breastfeeding, and infant survival: prospective analysis of pooled data from three randomised trials. *The Lancet Global Health* 2016;**4**(4):e266-e75 doi: [http://dx.doi.org/10.1016/S2214-109X\(16\)00040-1](http://dx.doi.org/10.1016/S2214-109X(16)00040-1)[published Online First: Epub Date]].
33. Horta BL, Loret de Mola C, Victora CG. Long-term consequences of breastfeeding on cholesterol, obesity, systolic blood pressure and type 2 diabetes: a systematic review and meta-analysis. *Acta Paediatrica* 2015;**104**:30-37 doi: 10.1111/apa.13133[published Online First: Epub Date]].
34. Brion M-JA, Lawlor DA, Matijasevich A, et al. What are the causal effects of breastfeeding on IQ, obesity and blood pressure? Evidence from comparing high-income with middle-income cohorts. *International Journal of Epidemiology* 2011 doi: 10.1093/ije/dyr020[published Online First: Epub Date]].
35. Martin RM, Patel R, Kramer MS, et al. Effects of promoting longer-term and exclusive breastfeeding on adiposity and insulin-like growth factor-i at age 11.5 years: A randomized trial. *JAMA* 2013;**309**(10):1005-13 doi: 10.1001/jama.2013.167[published Online First: Epub Date]].

- 1  
2  
3 36. Gupta A, Dadhich JP, Faridi MMA. Breastfeeding and complementary feeding as a public health  
4 intervention for child survival in India. *Indian J Pediatr* 2010;**77**(4):413-18 doi: 10.1007/s12098-010-  
5 0049-6[published Online First: Epub Date]].  
6  
7 37. Census of India 2011. Population Projections for India and States 2001-2026: Report of the Technical  
8 Group on Population Projections Constituted by the National Commission on Population. New Delhi:  
9 Office of the Registrar General and Census Commissioner, 2006.  
10  
11 38. Renfrew MJ, McCormick FM, Wade A, et al. Support for healthy breastfeeding mothers with healthy term  
12 babies. *The Cochrane database of systematic reviews* 2012;**5**:CD001141-CD41 doi:  
13 10.1002/14651858.CD001141.pub4[published Online First: Epub Date]].  
14  
15 39. Rollins NC, Bhandari N, Hajeebhoy N, et al. Why invest, and what it will take to improve breastfeeding  
16 practices? *The Lancet* 2016;**387**(10017):491-504 doi: [http://dx.doi.org/10.1016/S0140-](http://dx.doi.org/10.1016/S0140-6736(15)01044-2)  
17 [6736\(15\)01044-2](http://dx.doi.org/10.1016/S0140-6736(15)01044-2)[published Online First: Epub Date]].  
18  
19  
20  
21  
22  
23  
24  
25  
26  
27  
28  
29  
30  
31  
32  
33  
34  
35  
36  
37  
38  
39  
40  
41  
42  
43  
44  
45  
46  
47  
48  
49  
50  
51  
52  
53  
54  
55  
56  
57  
58  
59  
60

Figure 1. Model of the association between village level urbanicity, individual level socio-economic indicators, and breastfeeding practices

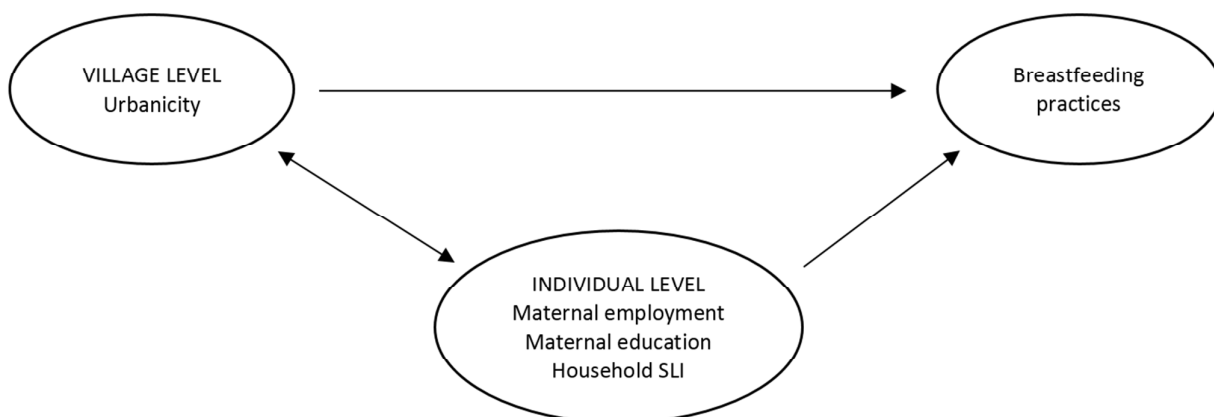

Peer review only

Figure 2. Flowchart of how samples for the two breastfeeding indicators were reached

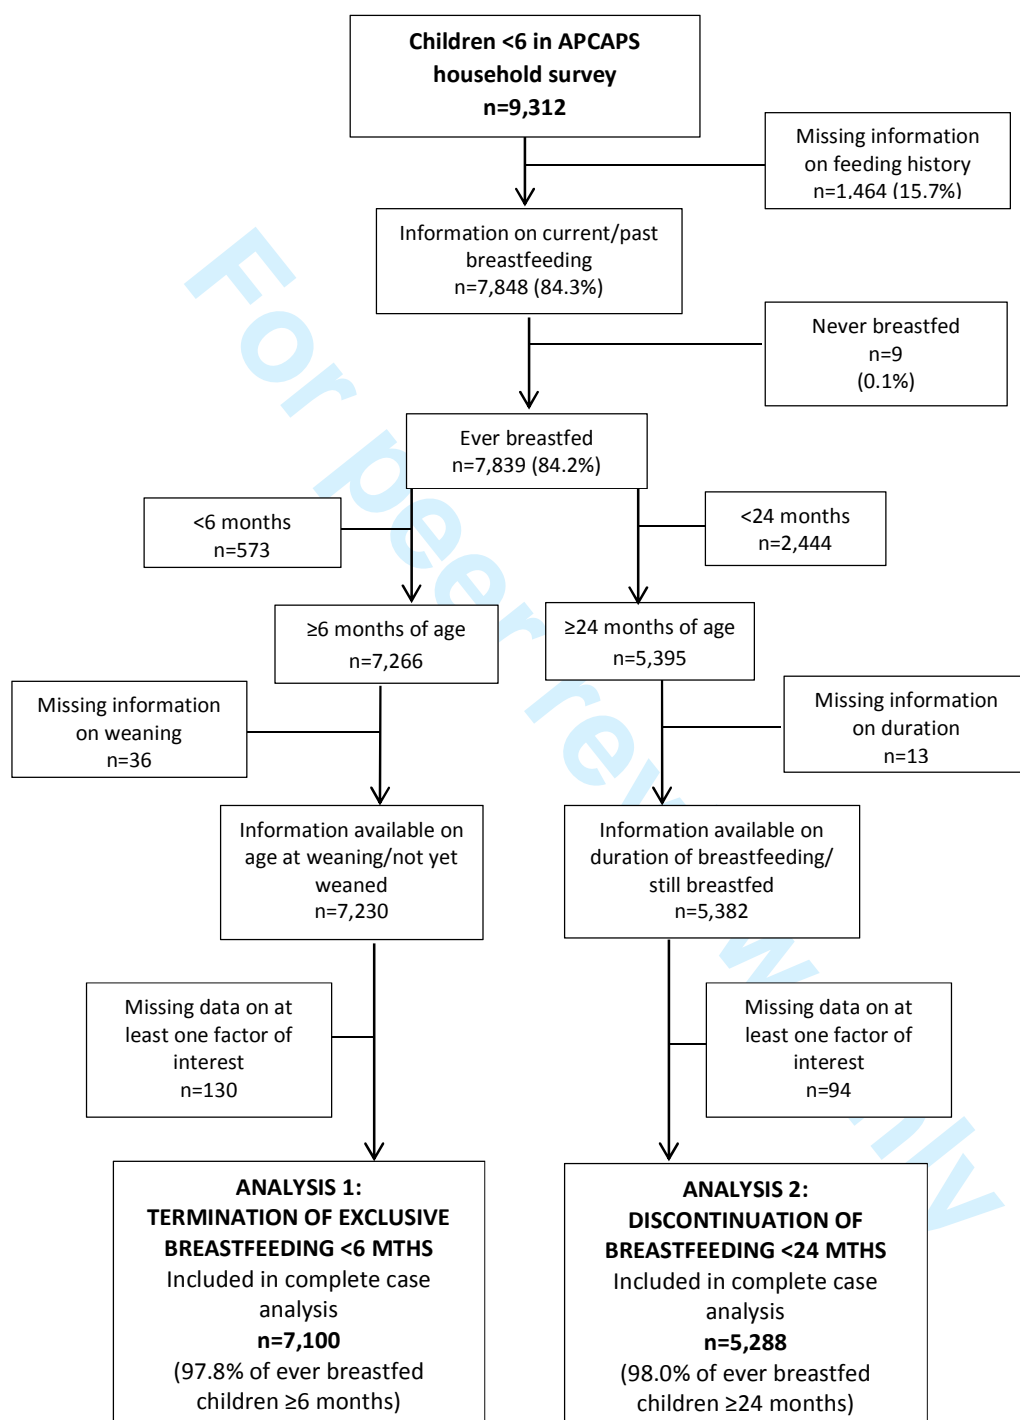

Table 1. Characteristics of ever breastfed children under 6 in the APCAPS household survey, by village urbanicity tertile (n=7839)

|                                       |                         | Urbanicity<br>(measured by night-time light intensity) |        |                                 |        |                              |        | ALL  |        |
|---------------------------------------|-------------------------|--------------------------------------------------------|--------|---------------------------------|--------|------------------------------|--------|------|--------|
|                                       |                         | HIGH<br>tertile 1<br>(n=4276)                          |        | MEDIUM<br>tertile 2<br>(n=2082) |        | LOW<br>tertile 3<br>(n=1476) |        |      |        |
|                                       |                         | n                                                      | (%)    | n                               | (%)    | n                            | (%)    | n    | (%)    |
| <b>Exclusive breastfeeding</b>        | Yes                     | 2495                                                   | (63.5) | 1400                            | (72.8) | 915                          | (66.4) | 4810 | (66.5) |
|                                       | ≥6 months <sup>1</sup>  | 1436                                                   | (36.5) | 522                             | (27.2) | 462                          | (33.6) | 2420 | (33.5) |
| <b>Continued breastfeeding</b>        | Yes                     | 1701                                                   | (57.9) | 927                             | (65.0) | 717                          | (70.4) | 3345 | (62.2) |
|                                       | ≥24 months <sup>2</sup> | 1236                                                   | (42.1) | 499                             | (35.0) | 302                          | (29.6) | 2037 | (37.8) |
| <b>Infant sex</b>                     | Male                    | 2189                                                   | (51.2) | 1069                            | (51.2) | 748                          | (50.5) | 4006 | (51.1) |
|                                       | Female                  | 2087                                                   | (48.8) | 1013                            | (48.7) | 733                          | (49.5) | 3833 | (48.9) |
| <b>Age of child at survey</b>         | 0-1                     | 1337                                                   | (31.3) | 650                             | (31.2) | 457                          | (30.9) | 2444 | (31.2) |
|                                       | 2-3                     | 1520                                                   | (35.5) | 718                             | (34.5) | 535                          | (36.1) | 2773 | (35.4) |
|                                       | 4-5                     | 1419                                                   | (33.2) | 714                             | (34.3) | 489                          | (33.0) | 2622 | (33.4) |
| <b>Birth order</b>                    | 1                       | 1824                                                   | (43.1) | 883                             | (42.7) | 607                          | (41.0) | 3314 | (42.6) |
|                                       | 2                       | 1667                                                   | (39.4) | 798                             | (38.6) | 588                          | (39.8) | 3053 | (39.2) |
|                                       | ≥3                      | 743                                                    | (17.5) | 389                             | (18.8) | 284                          | (19.2) | 1416 | (18.2) |
|                                       | missing                 | 42                                                     |        | 12                              |        | 2                            |        | 56   |        |
|                                       | mean (SD)               | 1.79                                                   | (0.85) | 1.80                            | (0.85) | 1.82                         | (0.85) | 1.80 | (0.85) |
| <b>Age of mother at birth</b>         | <20                     | 737                                                    | (17.3) | 364                             | (17.6) | 276                          | (18.6) | 1377 | (17.6) |
|                                       | 20-24                   | 2410                                                   | (56.5) | 1238                            | (59.6) | 862                          | (57.7) | 4510 | (57.7) |
|                                       | 25-29                   | 917                                                    | (22.1) | 393                             | (19.0) | 288                          | (20.2) | 1598 | (20.2) |
|                                       | 30+                     | 198                                                    | (44.6) | 78                              | (3.8)  | 54                           | (3.6)  | 330  | (4.2)  |
|                                       | missing                 | 14                                                     |        | 9                               |        | 1                            |        | 24   |        |
|                                       | mean (SD)               | 22.9                                                   | (3.6)  | 22.7                            | (3.4)  | 22.7                         | (3.5)  | 22.8 | (3.5)  |
| <b>Family structure</b>               | Nuclear                 | 2866                                                   | (67.6) | 1306                            | (63.7) | 942                          | (64.0) | 5114 | (65.9) |
|                                       | Joint/extended          | 1371                                                   | (32.4) | 745                             | (36.3) | 530                          | (36.0) | 2646 | (34.1) |
|                                       | missing                 | 39                                                     |        | 31                              |        | 9                            |        | 79   |        |
| <b>Maternal education</b>             | No formal schooling     | 1054                                                   | (24.7) | 663                             | (32.0) | 558                          | (37.7) | 2275 | (29.1) |
|                                       | Primary                 | 880                                                    | (20.6) | 390                             | (18.8) | 284                          | (19.2) | 1554 | (19.9) |
|                                       | Secondary+              | 2329                                                   | (54.6) | 1022                            | (49.3) | 638                          | (43.1) | 3989 | (51.0) |
|                                       | missing                 | 13                                                     |        | 7                               |        | 1                            |        | 21   |        |
| <b>Maternal employment</b>            | Not working             | 3144                                                   | (73.8) | 1342                            | (64.7) | 815                          | (55.0) | 5301 | (67.8) |
|                                       | Working                 | 1119                                                   | (26.2) | 733                             | (35.3) | 666                          | (45.0) | 2518 | (32.2) |
|                                       | missing                 | 13                                                     |        | 7                               |        | 0                            |        | 20   |        |
| <b>Standard of living (SLI) index</b> | Poorest                 | 611                                                    | (14.3) | 318                             | (15.3) | 242                          | (16.3) | 1171 | (14.9) |
|                                       | Poorer                  | 736                                                    | (17.2) | 422                             | (20.3) | 288                          | (19.4) | 1446 | (18.5) |
|                                       | Middle                  | 816                                                    | (19.1) | 458                             | (22.0) | 378                          | (25.5) | 1652 | (21.1) |
|                                       | Richer                  | 964                                                    | (22.5) | 497                             | (23.9) | 314                          | (21.2) | 1775 | (22.6) |
|                                       | Richest                 | 1148                                                   | (26.9) | 386                             | (18.5) | 259                          | (17.5) | 1793 | (22.9) |
|                                       | missing                 | 1                                                      |        | 1                               |        | 0                            |        | 2    |        |

<sup>1</sup>Restricted to ever breastfed infants aged at least 6 months not yet weaned/with age at weaning (n=7230)<sup>2</sup>Restricted to ever breastfed infants aged at least 24 months still breastfed/with age at cessation of breastfeeding (n=5382)<sup>3</sup>chi-square test of independence for association with urbanicity

Table 2. Results of multilevel logistic regression models for the association between urbanicity or individual/household socio-economic factors and termination of exclusive breastfeeding <6 months, among ever-breastfed children under 6 in the APCAPS household survey<sup>1</sup>

| Termination of exclusive breastfeeding <6 months (n=7100) |                                               |            |        |                   |              |                                         |          |                                                |              |                                                            |          |        |              |
|-----------------------------------------------------------|-----------------------------------------------|------------|--------|-------------------|--------------|-----------------------------------------|----------|------------------------------------------------|--------------|------------------------------------------------------------|----------|--------|--------------|
|                                                           |                                               | Unadjusted |        | Model 1<br>(null) |              | Model 2<br>(L1 confounders<br>+ L2 SES) |          | Model 3<br>(L1 confounders<br>+ L3 urbanicity) |              | Model 4<br>(L1 confounders<br>+ L2 SES<br>+ L3 urbanicity) |          |        |              |
|                                                           |                                               | n          | (%)    | OR                | (95% CI)     | OR                                      | (95% CI) | OR                                             | (95% CI)     | OR                                                         | (95% CI) | OR     | (95% CI)     |
| <b>FIXED EFFECTS</b>                                      |                                               |            |        |                   |              |                                         |          |                                                |              |                                                            |          |        |              |
| <b>Maternal education</b>                                 | No formal schooling                           | 615        | (29.1) | ref               |              | ref                                     |          | ref                                            |              | ref                                                        |          | ref    |              |
|                                                           | Primary                                       | 534        | (38.6) | 3.42              | (2.23, 5.25) |                                         |          | 3.37                                           | (2.13, 5.31) |                                                            |          | 3.36   | (2.13, 5.30) |
|                                                           | Secondary+                                    | 1231       | (38.2) | 1.82              | (1.29, 2.57) |                                         |          | 1.69                                           | (1.12, 2.54) |                                                            |          | 1.69   | (1.12, 2.54) |
| <b>Maternal employment</b>                                | Not working                                   | 1584       | (33.5) | ref               |              | ref                                     |          | ref                                            |              | ref                                                        |          | ref    |              |
|                                                           | Working                                       | 796        | (33.7) | 0.94              | (0.69, 1.28) |                                         |          | 1.43                                           | (1.00, 2.03) |                                                            |          | 1.43   | (1.00-2.04)  |
| <b>Standard of living (SLI) index</b>                     | Poorest                                       | 280        | (26.8) | ref               |              | ref                                     |          | ref                                            |              | ref                                                        |          | ref    |              |
|                                                           | Poorer                                        | 432        | (32.9) | 1.80              | (1.07, 3.02) |                                         |          | 1.65                                           | (0.97, 2.81) |                                                            |          | 1.66   | (0.98, 2.82) |
|                                                           | Middle                                        | 525        | (35.1) | 2.24              | (1.36, 3.71) |                                         |          | 2.08                                           | (1.24, 3.50) |                                                            |          | 2.09   | (1.24, 3.51) |
|                                                           | Richer                                        | 564        | (35.1) | 2.19              | (1.33, 3.59) |                                         |          | 1.98                                           | (1.17, 3.34) |                                                            |          | 1.99   | (1.18, 3.35) |
|                                                           | Richest                                       | 579        | (35.3) | 2.22              | (1.35, 3.65) |                                         |          | 2.11                                           | (1.22, 3.63) |                                                            |          | 2.11   | (1.23, 3.64) |
| <i>trend<sup>2</sup> (p value)</i>                        |                                               |            |        | 0.004             |              | 0.003                                   |          | 0.003                                          |              | 0.015                                                      |          | 0.015  |              |
| <b>Urbanicity</b>                                         | Low                                           | 459        | (33.7) | ref               |              | ref                                     |          | ref                                            |              | ref                                                        |          | ref    |              |
|                                                           | Medium                                        | 517        | (27.5) | 0.49              | (0.15, 1.56) |                                         |          | 0.48                                           | (0.15, 1.54) |                                                            |          | 0.48   | (0.15, 1.51) |
|                                                           | High                                          | 1404       | (36.4) | 1.10              | (0.35, 3.45) |                                         |          | 1.09                                           | (0.34, 3.43) |                                                            |          | 1.04   | (0.34, 3.20) |
| <i>trend<sup>2</sup> (p value)</i>                        |                                               |            |        | 0.87              |              | 0.89                                    |          | 0.89                                           |              | 0.91                                                       |          | 0.91   |              |
| <b>RANDOM EFFECTS</b>                                     |                                               |            |        |                   |              |                                         |          |                                                |              |                                                            |          |        |              |
| Level 2 (mothers)                                         | <i>variance (SE)</i>                          |            |        | 13.6194 (1.2202)  |              | 13.9036 (1.2454)                        |          | 13.9888 (1.2531)                               |              | 13.9072                                                    |          | 1.2456 |              |
|                                                           | <i>PCV (compared to null)<sup>3</sup> (%)</i> |            |        | ref               |              | -2.09%                                  |          | -2.71%                                         |              | -2.11%                                                     |          | -2.11% |              |
| Level 3 (villages)                                        | <i>variance (SE)</i>                          |            |        | 1.4949 (0.4712)   |              | 1.4429 (0.4574)                         |          | 1.3870 (0.4427)                                |              | 1.3200                                                     |          | 0.4235 |              |
|                                                           | <i>PCV (compared to null)<sup>3</sup> (%)</i> |            |        | ref               |              | 3.48%                                   |          | 7.22%                                          |              | 11.70%                                                     |          | 11.70% |              |
|                                                           | <i>PCV (compared to model 2)<sup>4</sup></i>  |            |        | -                 |              | ref                                     |          | -                                              |              | 8.52%                                                      |          | 8.52%  |              |

<sup>1</sup>All ORs calculated using multilevel modelling and complete case sample (see Figure 2)

<sup>2</sup>Test for trend: p value including variable as linear

<sup>3</sup>Proportional Change in Variance ((model 1 variance – model X variance)/model 1 variance)\*100%

<sup>4</sup>Proportional Change in Variance ((model 2 variance – model 4 variance)/model 2 variance)\*100%

Table 3. Results of multilevel logistic regression models for the association between urbanicity or individual/household socio-economic factors and discontinuation of continued breastfeeding <24 months, among ever-breastfed children under 6 in the APCAPS household survey<sup>1</sup>

| Discontinuation of breastfeeding <24 months (n=5288) |                                    |            |        |                   |              |                                         |          |                                                |              |                                                            |              |         |          |
|------------------------------------------------------|------------------------------------|------------|--------|-------------------|--------------|-----------------------------------------|----------|------------------------------------------------|--------------|------------------------------------------------------------|--------------|---------|----------|
|                                                      |                                    | Unadjusted |        | Model 1<br>(null) |              | Model 2<br>(L1 confounders<br>+ L2 SES) |          | Model 3<br>(L1 confounders<br>+ L3 urbanicity) |              | Model 4<br>(L1 confounders<br>+ L2 SES<br>+ L3 urbanicity) |              |         |          |
|                                                      |                                    | n          | (%)    | OR                | (95% CI)     | OR                                      | (95% CI) | OR                                             | (95% CI)     | OR                                                         | (95% CI)     |         |          |
| <b>FIXED EFFECTS</b>                                 |                                    |            |        |                   |              |                                         |          |                                                |              |                                                            |              |         |          |
| <b>Maternal education</b>                            | No formal schooling                | 521        | (30.7) | ref               |              | ref                                     |          | ref                                            |              | ref                                                        |              |         |          |
|                                                      | Primary                            | 395        | (37.3) | 1.48              | (1.13, 1.94) |                                         |          | 1.21                                           | (0.88, 1.65) | 1.21                                                       | (0.88, 1.65) |         |          |
|                                                      | Secondary+                         | 1079       | (42.5) | 2.28              | (1.82, 2.87) |                                         |          | 1.63                                           | (1.23, 2.16) | 1.62                                                       | (1.22, 2.15) |         |          |
| <b>Maternal employment</b>                           | Not working                        | 1384       | (41.3) | ref               |              | ref                                     |          | ref                                            |              | ref                                                        |              |         |          |
|                                                      | Working                            | 611        | (31.6) | 0.55              | (0.45, 0.67) |                                         |          | 0.77                                           | (0.60, 0.99) | 0.78                                                       | (0.61, 0.99) |         |          |
| <b>Standard of (SLI) index</b>                       | Poorest                            | 271        | (34.6) | ref               |              | ref                                     |          | ref                                            |              | ref                                                        |              |         |          |
|                                                      | Poorer                             | 370        | (37.3) | 1.38              | (0.99, 1.91) |                                         |          | 1.18                                           | (0.82, 1.69) | 1.17                                                       | (0.82, 1.68) |         |          |
|                                                      | Middle                             | 374        | (33.1) | 1.07              | (0.78, 1.48) |                                         |          | 0.86                                           | (0.60, 1.24) | 0.86                                                       | (0.60, 1.23) |         |          |
|                                                      | Richer                             | 467        | (39.4) | 1.5               | (1.09, 2.06) |                                         |          | 1.05                                           | (0.73, 1.51) | 1.04                                                       | (0.73, 1.50) |         |          |
|                                                      | Richest                            | 513        | (42.9) | 1.75              | (1.28, 2.41) |                                         |          | 1.09                                           | (0.74, 1.59) | 1.08                                                       | (0.74, 1.57) |         |          |
| <i>trend<sup>2</sup> (p value)</i>                   |                                    |            |        | 0.001             |              | 0.027                                   |          | 0.915                                          |              |                                                            |              |         |          |
| <b>Urbanicity</b>                                    | Low                                | 290        | (29.5) | ref               |              | ref                                     |          | ref                                            |              | ref                                                        |              |         |          |
|                                                      | Medium                             | 494        | (34.6) | 1.40              | (0.72, 2.71) |                                         |          | 1.45                                           | (0.71, 2.96) | 1.35                                                       | (0.66, 2.79) |         |          |
|                                                      | High                               | 1213       | (42.2) | 2.74              | (1.42, 5.28) |                                         |          | 2.96                                           | (1.45, 6.05) | 2.64                                                       | (1.29, 5.42) |         |          |
|                                                      | <i>trend<sup>2</sup> (p value)</i> |            |        |                   | 0.003        |                                         | 0.003    |                                                | 0.008        |                                                            | 0.008        |         |          |
| <b>RANDOM EFFECTS</b>                                |                                    |            |        |                   |              |                                         |          |                                                |              |                                                            |              |         |          |
| Level 2 (mothers) <i>variance (SE)</i>               |                                    |            |        |                   |              | 3.2070                                  | (0.4847) | 4.1838                                         | (0.6347)     | 4.2895                                                     | (0.6445)     | 4.1793  | (0.6342) |
| <i>PCV (compared to null)<sup>3</sup> (%)</i>        |                                    |            |        |                   |              | ref                                     |          | -30.46%                                        |              | -33.75%                                                    |              | -30.32% |          |
| Level 3 (villages) <i>variance (SE)</i>              |                                    |            |        |                   |              | 0.6036                                  | (0.1966) | 0.6677                                         | (0.2221)     | 0.4942                                                     | (0.1718)     | 0.5029  | (0.1739) |
| <i>PCV (compared to null)<sup>3</sup> (%)</i>        |                                    |            |        |                   |              | ref                                     |          | -10.62%                                        |              | 18.12%                                                     |              | 16.68%  |          |
| <i>PCV (compared to model 2)<sup>4</sup></i>         |                                    |            |        |                   |              | -                                       |          | ref                                            |              | -                                                          |              | 24.68%  |          |

<sup>1</sup>All ORs calculated using multilevel modelling and complete case sample (see Figure 2)

<sup>2</sup>Test for trend: p value including variable as linear

<sup>3</sup>Proportional Change in Variance ((model 1 variance – model X variance)/model 1 variance)\*100%

<sup>4</sup>Proportional Change in Variance ((model 2 variance – model 4 variance)/model 2 variance)\*100%



1  
2  
3  
4  
5  
6  
7  
8  
9  
10  
11  
12  
13  
14  
15  
16  
17  
18  
19  
20  
21  
22  
23  
24  
25  
26  
27  
28  
29  
30  
31  
32  
33  
34  
35  
36  
37  
38  
39  
40  
41  
42  
43  
44  
45  
46  
47  
48  
49  
50  
51  
52  
53  
54  
55  
56  
57  
58  
59  
60

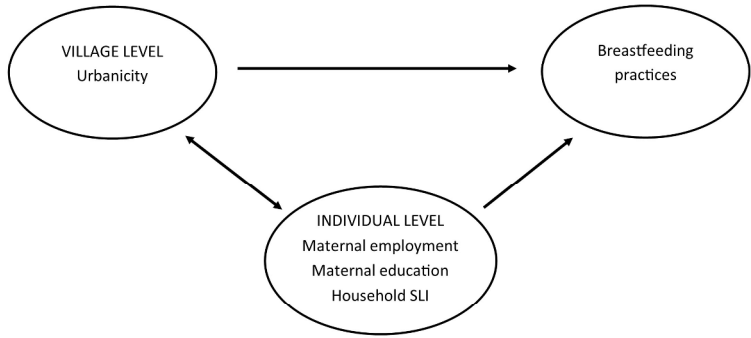

Figure 1. Model of the association between village level urbanicity, individual level socio-economic indicators, and breastfeeding practices

209x297mm (300 x 300 DPI)

1  
2  
3  
4  
5  
6  
7  
8  
9  
10  
11  
12  
13  
14  
15  
16  
17  
18  
19  
20  
21  
22  
23  
24  
25  
26  
27  
28  
29  
30  
31  
32  
33  
34  
35  
36  
37  
38  
39  
40  
41  
42  
43  
44  
45  
46  
47  
48  
49  
50  
51  
52  
53  
54  
55  
56  
57  
58  
59  
60

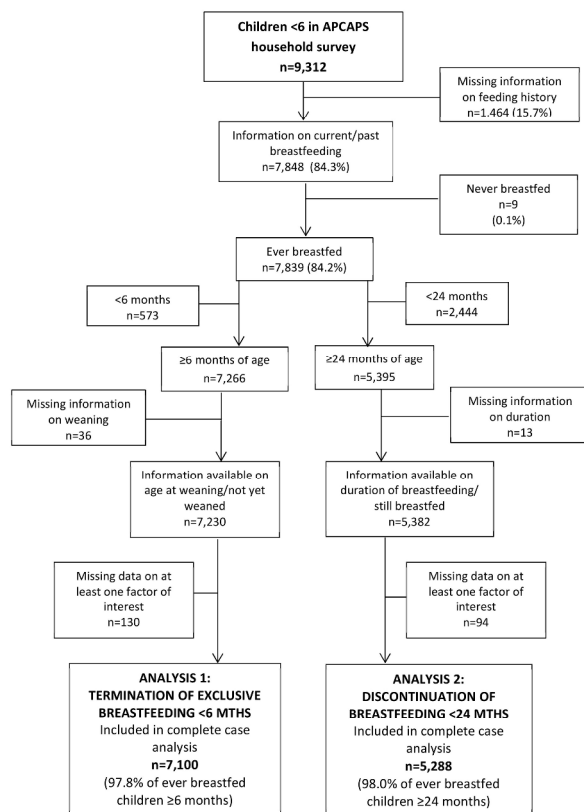

Figure 2. Flowchart of how samples for the two breastfeeding indicators were reached

297x420mm (300 x 300 DPI)

Supplementary table 1. Characteristics of children under 6 in the APCAPS household survey, by missing/non-missing information on breastfeeding history (n=9,312)

|                                          |         | Children <6 years (n=9,312)                         |            |                           |            |                |
|------------------------------------------|---------|-----------------------------------------------------|------------|---------------------------|------------|----------------|
|                                          |         | Information on current/past breastfeeding available |            |                           |            |                |
|                                          |         | Yes (non-missing)<br>(n=7,848)                      |            | No (missing)<br>(n=1,464) |            | <i>p value</i> |
|                                          |         | <b>n</b>                                            | <b>(%)</b> | <b>n</b>                  | <b>(%)</b> |                |
| <b>INDIVIDUAL LEVEL</b>                  |         |                                                     |            |                           |            |                |
| <b>Infant sex</b>                        | Male    | 4011                                                | (51.1)     | 773                       | (52.8)     | 0.23           |
|                                          | Female  | 3837                                                | (48.9)     | 691                       | (47.2)     |                |
| <b>Age of infant</b>                     | 0-1     | 2445                                                | (31.2)     | 445                       | (30.4)     | 0.36           |
|                                          | 2-3     | 2776                                                | (35.4)     | 501                       | (34.2)     |                |
|                                          | 4-5     | 2627                                                | (33.5)     | 518                       | (35.4)     |                |
| <b>HOUSEHOLD LEVEL</b>                   |         |                                                     |            |                           |            |                |
| <b>Number of under 6s in household</b>   | 1       | 3192                                                | (40.7)     | 616                       | (42.1)     | 0.71           |
|                                          | 2       | 3846                                                | (49.0)     | 702                       | (48.0)     |                |
|                                          | ≥3      | 810                                                 | (10.3)     | 146                       | (10.0)     |                |
| <b>Standard of living (SLI) index</b>    | Poorest | 1172                                                | (14.9)     | 145                       | (15.5)     | 0.37           |
|                                          | Poorer  | 1447                                                | (18.4)     | 176                       | (18.8)     |                |
|                                          | Middle  | 1654                                                | (21.1)     | 211                       | (22.5)     |                |
|                                          | Richer  | 1777                                                | (22.6)     | 185                       | (19.8)     |                |
|                                          | Richest | 1796                                                | (22.9)     | 219                       | (23.4)     |                |
|                                          | Missing | 2                                                   |            | 528                       |            |                |
| <b>VILLAGE LEVEL</b>                     |         |                                                     |            |                           |            |                |
| <b>Night-time light intensity (NTLI)</b> | Low     | 1484                                                | (18.9)     | 271                       | (18.5)     | 0.09           |
|                                          | Medium  | 2086                                                | (26.6)     | 353                       | (24.1)     |                |
|                                          | High    | 4278                                                | (54.5)     | 840                       | (57.4)     |                |



## STROBE Statement—checklist of items that should be included in reports of observational studies

|                           | Item No | Recommendation                                                                                                                                                                                                                                                                                                                                                                                                                                                                                                                                                                                                                                                                                   | Location in manuscript                                                                                                                       |
|---------------------------|---------|--------------------------------------------------------------------------------------------------------------------------------------------------------------------------------------------------------------------------------------------------------------------------------------------------------------------------------------------------------------------------------------------------------------------------------------------------------------------------------------------------------------------------------------------------------------------------------------------------------------------------------------------------------------------------------------------------|----------------------------------------------------------------------------------------------------------------------------------------------|
| <b>Title and abstract</b> | 1       | (a) Indicate the study's design with a commonly used term in the title or the abstract<br>(b) Provide in the abstract an informative and balanced summary of what was done and what was found                                                                                                                                                                                                                                                                                                                                                                                                                                                                                                    | <i>In abstract (cross-sectional survey), page 2</i><br><i>Done, page 2.</i>                                                                  |
| <b>Introduction</b>       |         |                                                                                                                                                                                                                                                                                                                                                                                                                                                                                                                                                                                                                                                                                                  |                                                                                                                                              |
| Background/rationale      | 2       | Explain the scientific background and rationale for the investigation being reported                                                                                                                                                                                                                                                                                                                                                                                                                                                                                                                                                                                                             | <i>Done, pages 4-5.</i>                                                                                                                      |
| Objectives                | 3       | State specific objectives, including any prespecified hypotheses                                                                                                                                                                                                                                                                                                                                                                                                                                                                                                                                                                                                                                 | <i>Done (objective in Introduction page 5, hypothesis in Methods page 8)</i>                                                                 |
| <b>Methods</b>            |         |                                                                                                                                                                                                                                                                                                                                                                                                                                                                                                                                                                                                                                                                                                  |                                                                                                                                              |
| Study design              | 4       | Present key elements of study design early in the paper                                                                                                                                                                                                                                                                                                                                                                                                                                                                                                                                                                                                                                          | <i>Done, pages 5-6.</i>                                                                                                                      |
| Setting                   | 5       | Describe the setting, locations, and relevant dates, including periods of recruitment, exposure, follow-up, and data collection                                                                                                                                                                                                                                                                                                                                                                                                                                                                                                                                                                  | <i>Done, pages 5-6.</i>                                                                                                                      |
| Participants              | 6       | (a) <i>Cohort study</i> —Give the eligibility criteria, and the sources and methods of selection of participants. Describe methods of follow-up<br><i>Case-control study</i> —Give the eligibility criteria, and the sources and methods of case ascertainment and control selection. Give the rationale for the choice of cases and controls<br><i>Cross-sectional study</i> —Give the eligibility criteria, and the sources and methods of selection of participants<br>(b) <i>Cohort study</i> —For matched studies, give matching criteria and number of exposed and unexposed<br><i>Case-control study</i> —For matched studies, give matching criteria and the number of controls per case | <i>Done, pages 5-6, 8-9 (please also see Fig 2)</i>                                                                                          |
| Variables                 | 7       | Clearly define all outcomes, exposures, predictors, potential confounders, and effect modifiers. Give diagnostic criteria, if applicable                                                                                                                                                                                                                                                                                                                                                                                                                                                                                                                                                         | <i>Done, pages 6-9.</i>                                                                                                                      |
| Data sources/measurement  | 8*      | For each variable of interest, give sources of data and details of methods of assessment (measurement). Describe comparability of assessment methods if there is more than one group                                                                                                                                                                                                                                                                                                                                                                                                                                                                                                             | <i>Done, pages 6-8.</i>                                                                                                                      |
| Bias                      | 9       | Describe any efforts to address potential sources of bias                                                                                                                                                                                                                                                                                                                                                                                                                                                                                                                                                                                                                                        | <i>Done, pages 7-8, 14-15.</i>                                                                                                               |
| Study size                | 10      | Explain how the study size was arrived at                                                                                                                                                                                                                                                                                                                                                                                                                                                                                                                                                                                                                                                        | <i>N/A (secondary analysis)</i>                                                                                                              |
| Quantitative variables    | 11      | Explain how quantitative variables were handled in the analyses. If applicable, describe which groupings were chosen and why                                                                                                                                                                                                                                                                                                                                                                                                                                                                                                                                                                     | <i>Done, pages 6-9.</i>                                                                                                                      |
| Statistical methods       | 12      | (a) Describe all statistical methods, including those used to control for confounding<br>(b) Describe any methods used to examine subgroups and interactions<br>(c) Explain how missing data were addressed<br>(d) <i>Cohort study</i> —If applicable, explain how loss to follow-up was                                                                                                                                                                                                                                                                                                                                                                                                         | <i>Done, pages 8-9.</i><br><i>Done, page 9.</i><br><i>Done (end of para 1 'Statistical analysis' page 8, also see Supplementary Table 1)</i> |

1 addressed

2 *Case-control study*—If applicable, explain how matching of cases and  
3 controls was addressed

4 *Cross-sectional study*—If applicable, describe analytical methods N/A

5 taking account of sampling strategy

6  
7 

---

*(e)* Describe any sensitivity analyses

8  
9 Continued on next page

10  
11  
12  
13  
14  
15  
16  
17  
18  
19  
20  
21  
22  
23  
24  
25  
26  
27  
28  
29  
30  
31  
32  
33  
34  
35  
36  
37  
38  
39  
40  
41  
42  
43  
44  
45  
46  
47  
48  
49  
50  
51  
52  
53  
54  
55  
56  
57  
58  
59  
60

For peer review only

| <b>Results</b>           |     | <b>Location in manuscript</b>                                                                                                                                                                                |                                          |
|--------------------------|-----|--------------------------------------------------------------------------------------------------------------------------------------------------------------------------------------------------------------|------------------------------------------|
| Participants             | 13* | (a) Report numbers of individuals at each stage of study—eg numbers potentially eligible, examined for eligibility, confirmed eligible, included in the study, completing follow-up, and analysed            | <i>Done, page 9 and Figure 2.</i>        |
|                          |     | (b) Give reasons for non-participation at each stage                                                                                                                                                         | <i>Done, Figure 2.</i>                   |
|                          |     | (c) Consider use of a flow diagram                                                                                                                                                                           | <i>Provided (Figure 2).</i>              |
| Descriptive data         | 14* | (a) Give characteristics of study participants (eg demographic, clinical, social) and information on exposures and potential confounders                                                                     | <i>Done, Table 1.</i>                    |
|                          |     | (b) Indicate number of participants with missing data for each variable of interest                                                                                                                          | <i>Done, Table 1.</i>                    |
|                          |     | (c) <i>Cohort study</i> —Summarise follow-up time (eg, average and total amount)                                                                                                                             |                                          |
| Outcome data             | 15* | <i>Cohort study</i> —Report numbers of outcome events or summary measures over time                                                                                                                          |                                          |
|                          |     | <i>Case-control study</i> —Report numbers in each exposure category, or summary measures of exposure                                                                                                         |                                          |
|                          |     | <i>Cross-sectional study</i> —Report numbers of outcome events or summary measures                                                                                                                           | <i>Done, Table 1.</i>                    |
| Main results             | 16  | (a) Give unadjusted estimates and, if applicable, confounder-adjusted estimates and their precision (eg, 95% confidence interval). Make clear which confounders were adjusted for and why they were included | <i>Done: pages 9-12, Tables 2 and 3.</i> |
|                          |     | (b) Report category boundaries when continuous variables were categorized                                                                                                                                    | <i>Tables 2 and 3.</i>                   |
|                          |     | (c) If relevant, consider translating estimates of relative risk into absolute risk for a meaningful time period                                                                                             |                                          |
| Other analyses           | 17  | Report other analyses done—eg analyses of subgroups and interactions, and sensitivity analyses                                                                                                               | <i>Done, pages 10-12.</i>                |
| <b>Discussion</b>        |     |                                                                                                                                                                                                              |                                          |
| Key results              | 18  | Summarise key results with reference to study objectives                                                                                                                                                     | <i>Done, pages 12-13.</i>                |
| Limitations              | 19  | Discuss limitations of the study, taking into account sources of potential bias or imprecision. Discuss both direction and magnitude of any potential bias                                                   | <i>Done, pages 14-15.</i>                |
| Interpretation           | 20  | Give a cautious overall interpretation of results considering objectives, limitations, multiplicity of analyses, results from similar studies, and other relevant evidence                                   | <i>Done, pages 15-16.</i>                |
| Generalisability         | 21  | Discuss the generalisability (external validity) of the study results                                                                                                                                        | <i>Done, pages 15-16.</i>                |
| <b>Other information</b> |     |                                                                                                                                                                                                              |                                          |
| Funding                  | 22  | Give the source of funding and the role of the funders for the present study and, if applicable, for the original study on which the present article is based                                                | <i>Done, page 17.</i>                    |

\*Give information separately for cases and controls in case-control studies and, if applicable, for exposed and unexposed groups in cohort and cross-sectional studies.

**Note:** An Explanation and Elaboration article discusses each checklist item and gives methodological background and published examples of transparent reporting. The STROBE checklist is best used in conjunction with this article (freely available on the Web sites of PLoS Medicine at <http://www.plosmedicine.org/>, Annals of Internal Medicine at <http://www.annals.org/>, and Epidemiology at <http://www.epidem.com/>). Information on the STROBE Initiative is available at [www.strobe-statement.org](http://www.strobe-statement.org).
