# Supplementary material for: Is increasing urbanicity associated with changes in breastfeeding duration in rural India? An analysis of cross-sectional household data from the Andhra Pradesh children and parents study
Source: PubMed Central journal article supplement (PMC5623574; doi:10.1136/bmjopen-2017-016331), 2017-09-21
Supplement: bmjopen-2017-016331supp001.pdf [file bmjopen-2017-016331supp001.pdf]

Supplementary table 1. Characteristics of children under 6 in the APCAPS household survey, by missing/non-missing information on breastfeeding history (n=9,312)

|                                          |         | Children <6 years (n=9,312)                         |        |                           |        |                |
|------------------------------------------|---------|-----------------------------------------------------|--------|---------------------------|--------|----------------|
|                                          |         | Information on current/past breastfeeding available |        |                           |        |                |
|                                          |         | Yes (non-missing)<br>(n=7,848)                      |        | No (missing)<br>(n=1,464) |        |                |
|                                          |         | n                                                   | (%)    | n                         | (%)    | <i>p value</i> |
| <b>INDIVIDUAL LEVEL</b>                  |         |                                                     |        |                           |        |                |
| <b>Infant sex</b>                        | Male    | 4011                                                | (51.1) | 773                       | (52.8) | <i>0.23</i>    |
|                                          | Female  | 3837                                                | (48.9) | 691                       | (47.2) |                |
| <b>Age of infant</b>                     | 0-1     | 2445                                                | (31.2) | 445                       | (30.4) | <i>0.36</i>    |
|                                          | 2-3     | 2776                                                | (35.4) | 501                       | (34.2) |                |
|                                          | 4-5     | 2627                                                | (33.5) | 518                       | (35.4) |                |
| <b>HOUSEHOLD LEVEL</b>                   |         |                                                     |        |                           |        |                |
| <b>Number of under 6s in household</b>   | 1       | 3192                                                | (40.7) | 616                       | (42.1) | <i>0.71</i>    |
|                                          | 2       | 3846                                                | (49.0) | 702                       | (48.0) |                |
|                                          | ≥3      | 810                                                 | (10.3) | 146                       | (10.0) |                |
| <b>Standard of living (SLI) index</b>    | Poorest | 1172                                                | (14.9) | 145                       | (15.5) | <i>0.37</i>    |
|                                          | Poorer  | 1447                                                | (18.4) | 176                       | (18.8) |                |
|                                          | Middle  | 1654                                                | (21.1) | 211                       | (22.5) |                |
|                                          | Richer  | 1777                                                | (22.6) | 185                       | (19.8) |                |
|                                          | Richest | 1796                                                | (22.9) | 219                       | (23.4) |                |
|                                          | Missing | 2                                                   |        | 528                       |        |                |
| <b>VILLAGE LEVEL</b>                     |         |                                                     |        |                           |        |                |
| <b>Night-time light intensity (NTLI)</b> | Low     | 1484                                                | (18.9) | 271                       | (18.5) | <i>0.09</i>    |
|                                          | Medium  | 2086                                                | (26.6) | 353                       | (24.1) |                |
|                                          | High    | 4278                                                | (54.5) | 840                       | (57.4) |                |
